# Supplementary material for: Impairment of DNA Methylation Maintenance Is the Main Cause of Global Demethylation in Naive Embryonic Stem Cells
Source: PubMed Central journal article supplement (PMC4914828; doi:10.1016/j.molcel.2016.04.025), 2016-06-16
Supplement: mmc3.pdf [file mmc3.pdf]

# Impairment of DNA Methylation Maintenance Is the Main Cause of Global Demethylation in Naive Embryonic Stem Cells

## Graphical Abstract

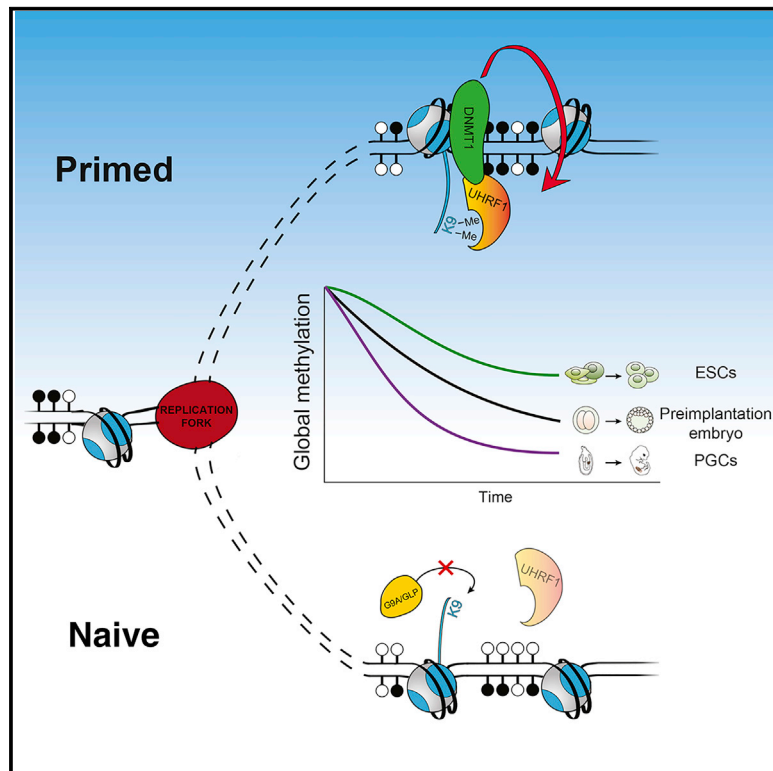

## Authors

Ferdinand von Meyenn, Mario Iurlaro, Ehsan Habibi, ..., Chuan He, Wolf Reik, Hendrik G. Stunnenberg

## Correspondence

wolf.reik@babraham.ac.uk (W.R.),  
h.stunnenberg@ncmls.ru.nl (H.G.S.)

## In Brief

Global demethylation during epigenetic reprogramming in preimplantation embryos, primordial germ cells, and naive embryonic stem cells is a consequence of impaired DNA methylation maintenance and synergistically regulated by a decrease in UHRF1 and H3K9me2 levels, while locus specific methylation maintenance is guided by specific recruitment of UHRF1 to H3K9me2/3. TET enzymes are dispensable for global DNA methylation reprogramming.

## Highlights

- Impaired DNA methylation maintenance is the cause of global demethylation in naive ESCs
- Loss of H3K9me2 and UHRF1 lead to impaired maintenance targeting to replication foci
- TET enzymes are not required for global demethylation
- Mathematical model accurately predicts global 5mC and 5hmC during epigenetic resetting

## Accession Numbers

GSE70724  
GSE77420

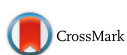

# Impairment of DNA Methylation Maintenance Is the Main Cause of Global Demethylation in Naive Embryonic Stem Cells

Ferdinand von Meyenn,<sup>1,10</sup> Mario Iurlaro,<sup>1,10</sup> Ehsan Habibi,<sup>2,10</sup> Ning Qing Liu,<sup>2</sup> Ali Salehzadeh-Yazdi,<sup>3,12</sup> Fátima Santos,<sup>1</sup> Edoardo Petrini,<sup>1</sup> Inês Milagre,<sup>1</sup> Miao Yu,<sup>4,5</sup> Zhenqing Xie,<sup>6</sup> Leonie I. Kroeze,<sup>7</sup> Tatyana B. Nesterova,<sup>8</sup> Joop H. Jansen,<sup>7</sup> Hehuang Xie,<sup>6</sup> Chuan He,<sup>4,5</sup> Wolf Reik,<sup>1,9,11,\*</sup> and Hendrik G. Stunnenberg<sup>2,11,\*</sup>

<sup>1</sup>Epigenetics Programme, Babraham Institute, Cambridge CB22 3AT, UK

<sup>2</sup>Department of Molecular Biology, Faculty of Science, Radboud University, 6525GA Nijmegen, the Netherlands

<sup>3</sup>Hematology-Oncology and Stem Cell Transplantation Research Center, Tehran University of Medical Sciences, Tehran, Iran

<sup>4</sup>Department of Chemistry, Department of Biochemistry and Molecular Biology, and Institute for Biophysical Dynamics, The University of Chicago, 929 East 57th Street, Chicago, IL 60637, USA

<sup>5</sup>Howard Hughes Medical Institute, The University of Chicago, 929 East 57th Street, Chicago, IL 60637, USA

<sup>6</sup>Virginia Bioinformatics Institute and Department of Biological Sciences, Virginia Tech, Blacksburg, VA 24060, USA

<sup>7</sup>Department of Laboratory Medicine, Laboratory of Hematology, Radboud University Nijmegen Medical Centre and Radboudumc Institute for Molecular Life Sciences (RIMLS), 6525GA Nijmegen, the Netherlands

<sup>8</sup>Developmental Epigenetics Group, Department of Biochemistry, University of Oxford, South Parks Road, Oxford OX1 3QU, UK

<sup>9</sup>Wellcome Trust Sanger Institute, Hinxton, Cambridge CB10 1SA, UK

<sup>10</sup>Co-first author

<sup>11</sup>Co-senior author

<sup>12</sup>Present address: Department of Systems Biology and Bioinformatics, University of Rostock, 18051 Rostock, Germany

\*Correspondence: [wolf.reik@babraham.ac.uk](mailto:wolf.reik@babraham.ac.uk) (W.R.), [h.stunnenberg@ncmls.ru.nl](mailto:h.stunnenberg@ncmls.ru.nl) (H.G.S.)

<http://dx.doi.org/10.1016/j.molcel.2016.04.025>

## SUMMARY

Global demethylation is part of a conserved program of epigenetic reprogramming to naive pluripotency. The transition from primed hypermethylated embryonic stem cells (ESCs) to naive hypomethylated ones (serum-to-2i) is a valuable model system for epigenetic reprogramming. We present a mathematical model, which accurately predicts global DNA demethylation kinetics. Experimentally, we show that the main drivers of global demethylation are neither active mechanisms (*Aicda*, *Tdg*, and *Tet1-3*) nor the reduction of de novo methylation. UHRF1 protein, the essential targeting factor for DNMT1, is reduced upon transition to 2i, and so is recruitment of the maintenance methylation machinery to replication foci. Concurrently, there is global loss of H3K9me<sub>2</sub>, which is needed for chromatin binding of UHRF1. These mechanisms synergistically enforce global DNA hypomethylation in a replication-coupled fashion. Our observations establish the molecular mechanism for global demethylation in naive ESCs, which has key parallels with those operating in primordial germ cells and early embryos.

## INTRODUCTION

Pluripotency describes the transient embryonic potential to form all embryonic germ layers and the germline, excluding the extra-

embryonic tissues (Smith, 2001). This state can be recapitulated in vitro in mouse embryonic stem cells (ESCs) derived from the inner cell mass (ICM), maintaining their pluripotent, self-renewing state and the ability to contribute to chimeric embryos (Martello and Smith, 2014). Dictated by the culture conditions, mouse ESCs can adopt two interconvertible states resembling two slightly different in vivo developmental stages. While originally mouse ESCs were grown in serum/leukemia inhibitory factor (LIF)-containing media (“serum ESCs”), recently, serum-free culture conditions have been established that favor derivation and propagation of mouse ESCs in the absence of serum (Ying et al., 2008). These conditions rely on specific inhibition of GSK3 $\beta$  and Erk1/2 and downstream signaling by two small-molecule inhibitors (“2i ESCs”). 2i ESCs transcriptionally closely resemble cells from the ICM (Nichols and Smith, 2012), and serum ESCs tend to phenocopy cells from the early epiblast and show a greater heterogeneity and differential expression of pluripotency and differentiation factors, resulting in overt and spontaneous differentiation if not held back by LIF (Canham et al., 2010; Singh et al., 2007; Tang et al., 2010). Accordingly, the state of 2i ESCs has been designated the “ground- or naive-state” of pluripotency, and cells grown in 2i are believed to be a much better representation of the cells from the ICM, compared to “primed” serum ESCs (Marks et al., 2012; Martello and Smith, 2014).

In vivo, acquisition of pluripotency in both primordial germ cells (PGCs) and the early embryo coincides with genome-wide epigenetic reprogramming of histone modifications and DNA hypomethylation (Guo et al., 2014; Kobayashi et al., 2012, 2013; Seisenberger et al., 2012; Smith et al., 2014). During the in vitro transition of ESCs from serum to 2i, the epigenome is also globally reprogrammed, with loss of H3K27me<sub>3</sub> at

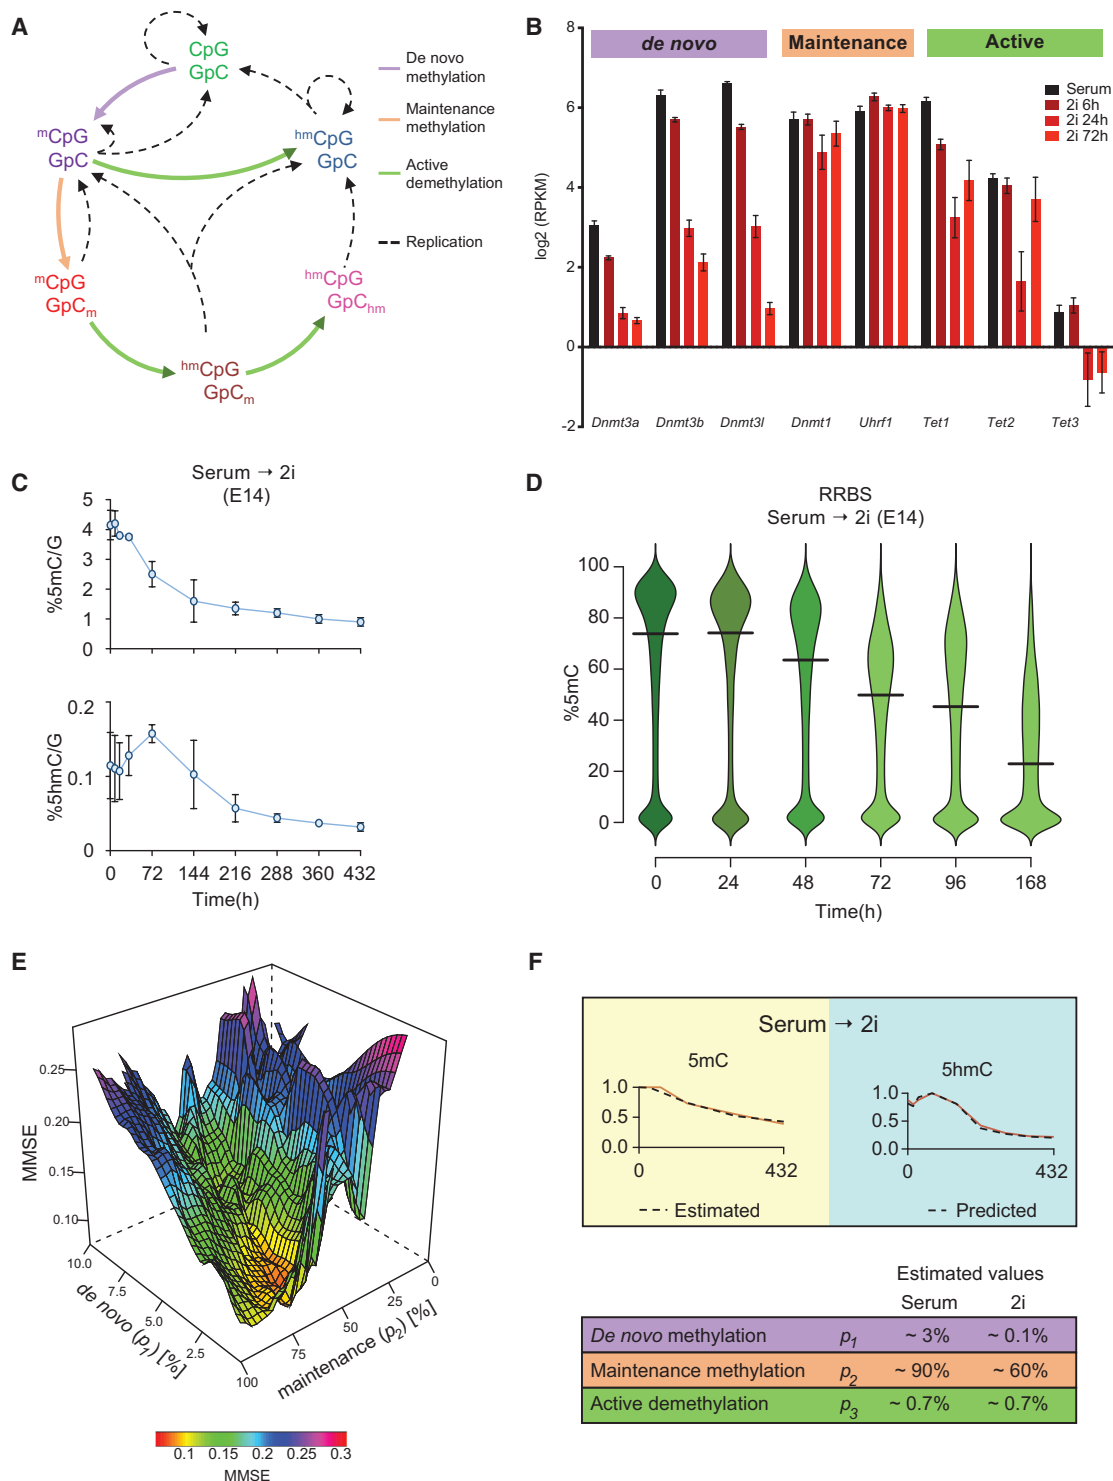

**Figure 1. Dynamic Regulation of 5mC and 5hmC during Serum-to-2i Conversion of Mouse ESCs**

(A) Schematic representation of cytosine methylation/demethylation cycle. Different forms of modified CpG dyads and the corresponding processes are indicated.

(B) Expression levels of genes involved in the DNA methylation machinery during serum-to-2i transition. Error bars indicate mean  $\pm$  SD from three biological replicates.

(C) Percentage of 5mC (top) and 5hmC (bottom) as measured by LC-MS in E14 during serum-to-2i conversion. Error bars indicate mean  $\pm$  SD from three biological replicates.

(legend continued on next page)

repressed promoters, but only minor changes in H3K4me3 and H3K9me3 (Marks et al., 2012). Recently, we and others showed that the genome of 2i ESCs is globally hypomethylated and as such similar to the cells in the ICM, whereas serum ESCs are hypermethylated (Ficz et al., 2013; Habibi et al., 2013; Hackett et al., 2013a; Leitch et al., 2013). To date, the molecular mechanisms regulating this conserved (Guo et al., 2014; Takashima et al., 2014; Wang et al., 2014) genome-wide demethylation in the naive state are unclear.

In the current study, we have revisited this transition and embarked on a comprehensive, time-resolved experimental and mathematical approach to reveal and verify the kinetics and interplay between the different components of the DNA demethylation machinery and to unravel the mechanistic regulation of the main pathway responsible for genome-wide DNA demethylation.

## RESULTS

### Demethylation Dynamics during Serum-to-2i Reprogramming

DNA demethylation dynamics can be attributed to three major pathways (Wu and Zhang, 2014): (1) maintenance DNA methylation or replication dependent passive dilution, (2) de novo DNA methylation, and (3) active DNA demethylation, primarily via DNA hydroxymethylation (Figure 1A). During the conversion from serum to 2i ESCs, the maintenance methylation components *Dnmt1* and *Uhrf1*, the ten-eleven translocation (TET) enzymes (*Tet1*, *Tet2*, and, at low levels, *Tet3*), *Aicda*, and *Tdg*, which have all been implicated in active DNA demethylation, are expressed at similar transcriptional levels. In contrast, the de novo methylases *Dnmt3a/b* and their regulator *Dnmt3l* are suppressed in the 2i state (Figures 1B and S1A).

To further understand the kinetics of the transition from serum to 2i ESCs, we determined their DNA methylation state at several time points. First, we quantified global levels of 5-methylcytosine (5mC) and 5-hydroxymethylcytosine (5hmC) by liquid chromatography followed by mass spectrometry (LC-MS) (Figure 1C) as well as by reduced representation bisulfite sequencing (RRBS) (Figure 1D), whole-genome bisulfite sequencing (WGBS), and TET-assisted bisulfite sequencing (TAB-seq) (Figures S1B and S1C). In line with our previous studies (Ficz et al., 2013; Habibi et al., 2013), DNA demethylation rapidly ensued after medium replacement (~32 hr; about two rounds of replication) and thereafter continued gradually, reaching a steady-state level after 14 days (Figure 1C). A moderate increase in 5hmC levels was observed up to 72 hr, suggesting the presence of TET activity.

### Mathematical Modeling of DNA Demethylation Kinetics

To dissect the role and relative contribution of the three pathways and the various regulatory factors involved, we used mathematical modeling to predict DNA demethylation throughout the time course. Since the first population-epigenetic models for DNA methylation dynamics were published (Otto and Walbot, 1990; Pfeifer et al., 1990), several studies were undertaken to improve the predictions by using different approaches and incorporating new biological concepts into the models (Arand et al., 2012; Genereux et al., 2005; McGovern et al., 2012; Sontag et al., 2006). Due to the lack of adequate experimental data describing DNA methylation changes genome-wide, previous descriptive and predictive models could not be fuelled with accurate input values and precise estimates of the parameters. To overcome this obstacle and to obtain accurate input values, we performed genome-wide hairpin bisulfite sequencing (Zhao et al., 2014) and combined these with our other sequencing datasets. We calculated the percentages of fully methylated CpG dyads (mCpG/GpCm), hemi-methylated CpG dyads (mCpG/GpC), and unmethylated CpG dyads (CpG/GpC) (Figure S1D; Table S1) as well as the levels of hydroxymethylated CpGs from TAB-seq data and hairpin bisulfite sequencing. These input values along with the global 5mC values from LC-MS were used to estimate the following parameters, which are directly proportional to the enzyme abundance and/or activity and reflect the amount of substrate that is converted to the product:  $p_1$ , a dynamic proportionality value for de novo methylation;  $p_2$ , a proportionality constant for maintenance methylation; and  $p_3$ , a proportionality constant for active demethylation (hydroxymethylation). Through several iterations of fitting the mathematical model to the 5mC data, we were able to estimate the values of the constants for the serum-to-2i transition in E14 ESCs with the lowest minimum mean square error (MMSE) (Figure 1E). The model also takes into account that the rate of de novo methylation ( $p_1$ ) changes gradually (Figure S1E). Using these values, the model recapitulates 5mC dynamics and predicts the dynamics of 5hmC in ESCs with excellent approximation ( $R^2 = 0.99$ ) (Figure 1F, blue panel, dotted line).  $p_1$ ,  $p_2$ , and  $p_3$  reflect the individual activity and overall contribution of the three pathways to the DNA methylation dynamics observed and predicts that maintenance methylation is significantly impaired and a major driver of the DNA demethylation observed (Figure 1F).

### Global Demethylation Kinetics in Mutants of the DNA Methylation Machinery

To validate and fully understand the contribution of the individual DNA methylation and demethylation enzymes in the genome-wide epigenetic reprogramming that characterizes the transition

(D) Percentage of 5mC methylation as measured by RRBS in E14 during serum-to-2i conversion. Horizontal bars represent the median values.

(E) Graphical representation of the mathematical modeling. The minimum mean square error (MMSE) is plotted against different values for de novo methylation ( $p_1$ ) and maintenance methylation ( $p_2$ ).

(F) Overlay of the mathematical model predictions (dotted line) with real measurements (red line) obtained from LC-MS in E14 during serum-to-2i conversion. The table summarizes the results of the mathematical modeling, showing the values estimated for  $p_1$ ,  $p_2$ , and  $p_3$  in the serum steady state and in 2i.  $p_1$ , proportion of unmethylated CpGs that become hemi-methylated per average cell division;  $p_2$ , proportion of hemi-methylated CpGs that become fully methylated per average cell division; and  $p_3$ , proportion of methylated CpGs that become hydroxymethylated per average cell division.

See also Figure S1 and Table S1.

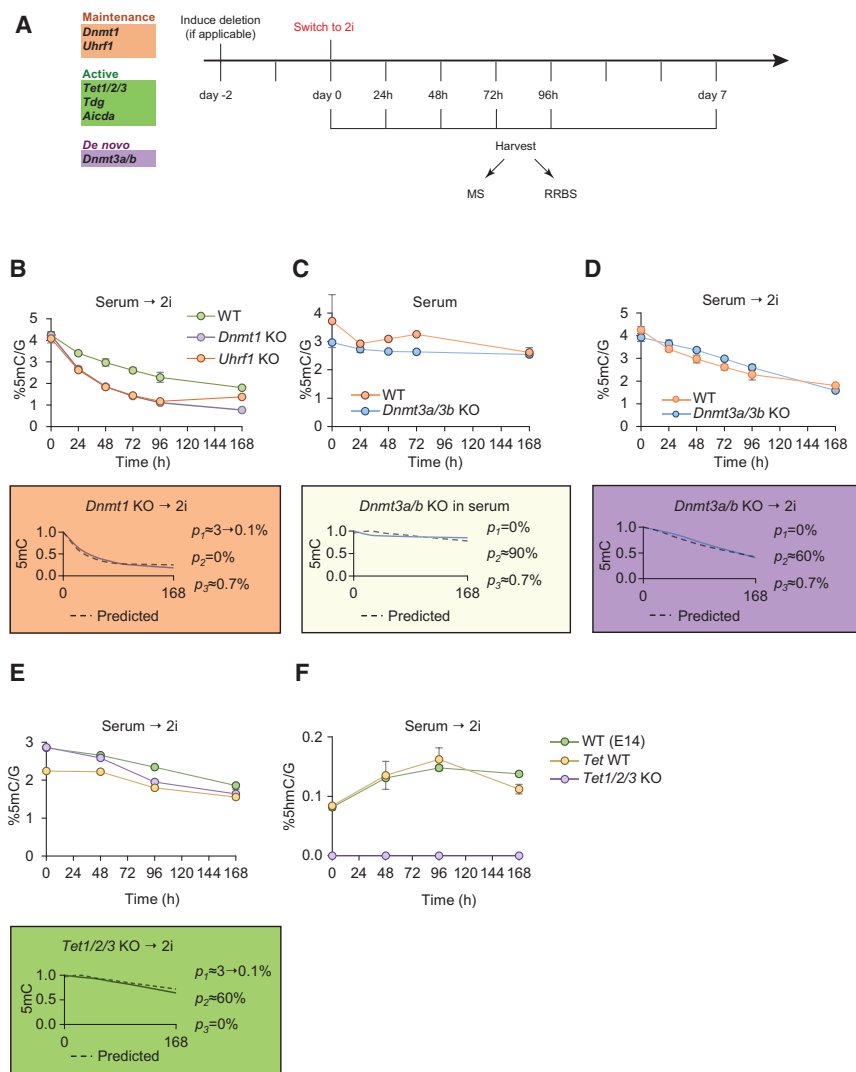

## Figure 2. Global Demethylation Kinetics in Mutants of the DNA Methylation Machinery

(A) Schematic representation of the experimental setup. Mutants for candidate genes related to global demethylation in the serum-to-2i conversion were initially grown in serum medium. At day 0, culture medium was switched to 2i. Cells were harvested after indicated times. DNA was extracted and analyzed for 5mC and 5hmC levels by LC-MS and/or RRBS.

(B) Levels of 5mC in *Uhrf1* and *Dnmt1* KO ESCs during the serum-to-2i transition, measured by mass spectrometry. The colored box shows the overlay between the mathematical model prediction (dotted line) with  $p_2 = 0\%$  and the normalized measured 5mC data. Error bars indicate mean  $\pm$  SD from three biological replicates.

(C) Levels of 5mC in inducible *Dnmt3a/b* KO after induction of deletion in serum media measured by mass spectrometry. The colored box shows the overlay between the mathematical model prediction (dotted line) with  $p_1 = 0\%$  and the normalized measured 5mC data.  $p_2 \approx 90\%$  since the cells were maintained in serum. Error bars indicate mean  $\pm$  SD from three biological replicates.

(D) Levels of 5mC in inducible *Dnmt3a/b* KO during the serum-to-2i transition. The colored box shows the overlay between the mathematical model prediction (dotted line) with  $p_1 = 0\%$  and the normalized measured 5mC data. Error bars indicate mean  $\pm$  SD from three biological replicates.

(E) Levels of 5mC in *Tet1/2/3* KO and controls during the serum-to-2i transition measured by mass spectrometry. The colored box shows the overlay between the mathematical model prediction (dotted line) with  $p_3 = 0\%$  and the normalized measured 5mC data. Error bars indicate mean  $\pm$  SD from three biological replicates.

(F) Levels of 5hmC in *Tet1/2/3* KO and controls during the serum-to-2i transition measured by mass spectrometry. Error bars indicate mean  $\pm$  SD from three biological replicates.

See also Figure S2.

from serum to 2i ESCs, we examined the dynamics of this loss of methylation in mouse embryonic stem cells in which one or more of the components of the DNA methylation machinery had been deleted. To this end, we determined the DNA methylation state at several time points in serum and during the transition from serum to 2i ESCs (Figure 2A) with inducible deletion of *Dnmt1* (*Dnmt1<sup>fl/fl</sup>*); *Uhrf1* (*Uhrf1<sup>fl/fl</sup>*); *Dnmt3a/b* (*Dnmt3a<sup>fl/fl</sup>*  $\times$  *Dnmt3b<sup>fl/fl</sup>*) or constitutive deletion of *Aicda* (*Aicda<sup>-/-</sup>*); *Tdg* (*Tdg<sup>-/-</sup>*); *Tet1/2* (*Tet1<sup>-/-</sup>*  $\times$  *Tet2<sup>-/-</sup>*); *Tet1/2/3* (*Tet1<sup>-/-</sup>*  $\times$  *Tet2<sup>-/-</sup>*  $\times$  *Tet3<sup>-/-</sup>*) and in corresponding wild-type control ESCs and compared these to the predictions of our model.

All mutant ESCs tested displayed global loss of 5mC upon serum-to-2i conversion. We specifically compared the rate of demethylation in ESCs lacking either *Dnmt1* or *Uhrf1* with control ESCs and observed an increased rate of demethylation (Figure 2B), showing that loss of DNA methylation maintenance results in increased demethylation rates. This supports the prediction from the mathematical model (dotted lines in the colored boxes) and implicates a failure of DNA methylation maintenance

in 2i ESCs, albeit not a complete loss. Next, we compared the demethylation kinetics in ESCs lacking *Dnmt3a* and *Dnmt3b*. Interestingly, deletion of *Dnmt3a/b* in serum grown ESCs results in only a marginal decrease in the genomic level of 5mC (Figure 2C), and the kinetics of DNA demethylation are unaltered in the serum-to-2i conversion (Figure 2D), showing that loss of de novo methylation is not responsible for global loss of DNA methylation. Finally, we assessed the contribution of enzymes involved in active demethylation pathways in the serum-to-2i conversion. As predicted by the model, ESCs lacking *Tet1/2/3*, *Tdg*, or *Aicda* showed strikingly similar demethylation dynamics to their wild-type control counterparts (Figures 2E, S2A, and S2B). Since TET-driven oxidation has been previously suggested as a potential driver of demethylation in the serum-to-2i conversion, we confirmed the loss of 5hmC in *Tet1/2/3* knockout (KO) cells (Figure 2F). This shows that the TET enzymes are actively oxidizing 5mC during the serum-to-2i conversion but are neither sufficient nor necessary for global DNA demethylation.

### Locus-Specific Involvement of TET-Dependent Demethylation

The increased levels of 5hmC during the serum-to-2i conversion as well as publications showing further TET-dependent hypomethylation in vitamin C (vitC)-treated 2i ESCs (Blaschke et al., 2013; Chung et al., 2010; Yin et al., 2013) raised the possibility that TET proteins could contribute to the observed demethylation dynamics. We determined the 5mC and 5hmC levels of ESCs at several time points during the serum-to-2i conversion in the presence or absence of vitC (Figure 3A) and observed a significant increase in 5hmC upon vitC treatment, which resulted in an accelerated rate of demethylation and further global hypomethylation. To confirm that this effect was TET dependent, we measured the levels of 5mC and 5hmC in *Tet1/2* KO cells in the presence or absence of vitC (Figure 3B), showing that the increased rate of demethylation (and hydroxymethylation) is dependent on the activity of TET proteins. Using the values of  $p_1$  and  $p_2$  from E14 ESCs (Figure 1F), we estimated an ~4-fold increase of active demethylation ( $p_3$ ) in the presence of vitC. Mathematical modeling of the dynamics of 5hmC accurately predicts the observed 5hmC levels during the serum-to-2i conversion in the presence of vitC (Figure S3A).

Having established that exclusively in the presence of vitC TET proteins contribute to global loss of 5mC in the serum-to-2i conversion, we asked whether TET-dependent hydroxymethylation is essential for locus specific demethylation. We performed TAB-seq in parallel to WGBS on the same DNA during the early phase of the time course in the presence or absence of vitC (Figure S3B) as well as RRBS from *Tet1/2/3* KO cells and corresponding wild-type control ESCs during different time points of the serum-to-2i conversion (Figure S3C). These datasets confirmed that TET-dependent hydroxymethylation does not significantly contribute to global demethylation, unless their activity was enhanced by vitC (~3-fold increase in 5hmC in the first 32 hr). We analyzed the distribution of 5mC and 5hmC over functionally distinct genomic regions with 5hmC enrichment in serum (Figure 3C) and stratified promoters into high-, intermediate-, and low-CpG-density promoters (HCP, ICP, and LCP, respectively) (Weber et al., 2007). The majority of HCPs ( $n = 3,121$ ) are very low methylated in serum, and only a small subgroup are intermediate ( $n = 143$ ) or intermediate-low ( $n = 563$ ) methylated, containing some germ cell-specific genes (e.g., *Dazl*, *Prdm14*, and *Dppa3*) (Figure S3D). In the absence of vitC, we observe only minor if any change in 5mC/5hmC levels over any of the three classes of promoters. In the presence of vitC, however, conversion of 5mC to 5hmC is already apparent as early as 4 hr, and the speed of 5mC loss correlates with CpG density and is different for each class. The kinetics of 5mC to 5hmC conversion and subsequent loss of 5hmC (73% loss) is fastest at HCPs, while ICPs show less dramatic changes (32% loss), with substantial loss of 5hmC being apparent only later. At LCPs, 5hmC slowly accumulates over the time period investigated. Enhancers, defined as elements overlapping H3K4me1, H3K27ac, and DNaseI hypersensitivity and excluding transcription start sites (TSS) ( $\pm 2$  kb) in E14 serum ESCs, show 10%–40% 5mC levels in serum ESCs, in line with previous studies showing that enhancers have low abundance of 5mC (Stadler et al., 2011) and follow kinetics similar to ICPs. The largest part of the

genome behaves similar to LCPs; conversion to 5hmC and subsequent erasure is very slow (Figure 3C).

Finally, we analyzed the methylome in *Tet1/2/3* KO cells. Using k-means clustering on average DNA methylation over 500-bp tiles across the genome, we found a cluster of tiles ( $n = 3,770$ ) that maintains methylation in *Tet1/2/3* KO cells, but not in the corresponding wild-type control cells (Figure 3D). These regions have higher 5mC levels in the *Tet1/2/3* KO cells, but we could not identify any significant functional enrichment associated with them (Table S2).

### UHRF1 Is Downregulated at the Protein Level during the Serum-to-2i Transition

The mathematical model had predicted that maintenance methylation is significantly impaired and a major driver of the DNA demethylation observed (Figure 1F). Subsequently, we confirmed the rapid demethylation upon deletion of *Dnmt1* or *Uhrf1* (Figure 2B) and also showed that loss of de novo methylation does not explain the demethylation dynamics observed (Figures 2C and 2D). In order to understand the mechanistic regulation of this impairment, we focused on the individual components of the maintenance methylation machinery, in particular on the role of *Uhrf1*.

In primordial germ cells, maintenance methylation was reported to be impaired in part by nuclear exclusion of UHRF1 (Seisenberger et al., 2012). We analyzed the subcellular localization of UHRF1 and DNMT1 in ESCs grown in serum and 2i (Figure 4A) and did not detect any nuclear exclusion of either UHRF1 or DNMT1 in ESCs. However, we observed a reduction in the signal intensity of UHRF1 protein in the 2i samples. Our initial transcriptomic analysis of the cells undergoing serum-to-2i transition (Figure 1B) did show that the expression of *Dnmt3a* and *Dnmt3b*, together with the catalytically inactive regulatory isoform *Dnmt3l*, was substantially reduced in 2i, while *Uhrf1* mRNA levels were unchanged. In contrast, UHRF1 protein levels were significantly reduced (~3-fold by western blot; 2-fold by quantitative mass spectrometry) in 2i ESCs (Figures 4B–4D), as were the levels of the de novo DNMTs (Figure S4A). We found heterogeneous expression of UHRF1 in serum and 2i ESCs (Figure 4C), which did not correlate with the expression of the pluripotency marker NANOG (Figure S4B) but can be attributed to the cell-cycle-dependent regulation of UHRF1 (Bonapace et al., 2002). To further confirm the observation that UHRF1 is regulated at the protein level, we generated an ESC line with constitutive overexpression of an UHRF1-GFP fusion protein. Similar to our observations on endogenous UHRF1, fluorescence-activated cell sorting (FACS) analysis of the UHRF1-GFP cell line showed that UHRF1-GFP was expressed in serum ESCs but was rapidly lost upon serum-to-2i conversion (Figures 4E and S4C), while mRNA levels of endogenous *Uhrf1* and exogenous *Uhrf1-Gfp* remained stable (Figure S4D). Interestingly, we also observed a rapid increase of UHRF1-GFP protein levels upon transfer back to serum growth conditions (Figure S4E), suggesting that the changed signaling environment in 2i specifically affects UHRF1 protein stability.

To confirm whether the regulation of UHRF1 at the protein level was also relevant in human ESCs, we assessed mRNA and protein levels in conventional and naive (Takashima et al.,

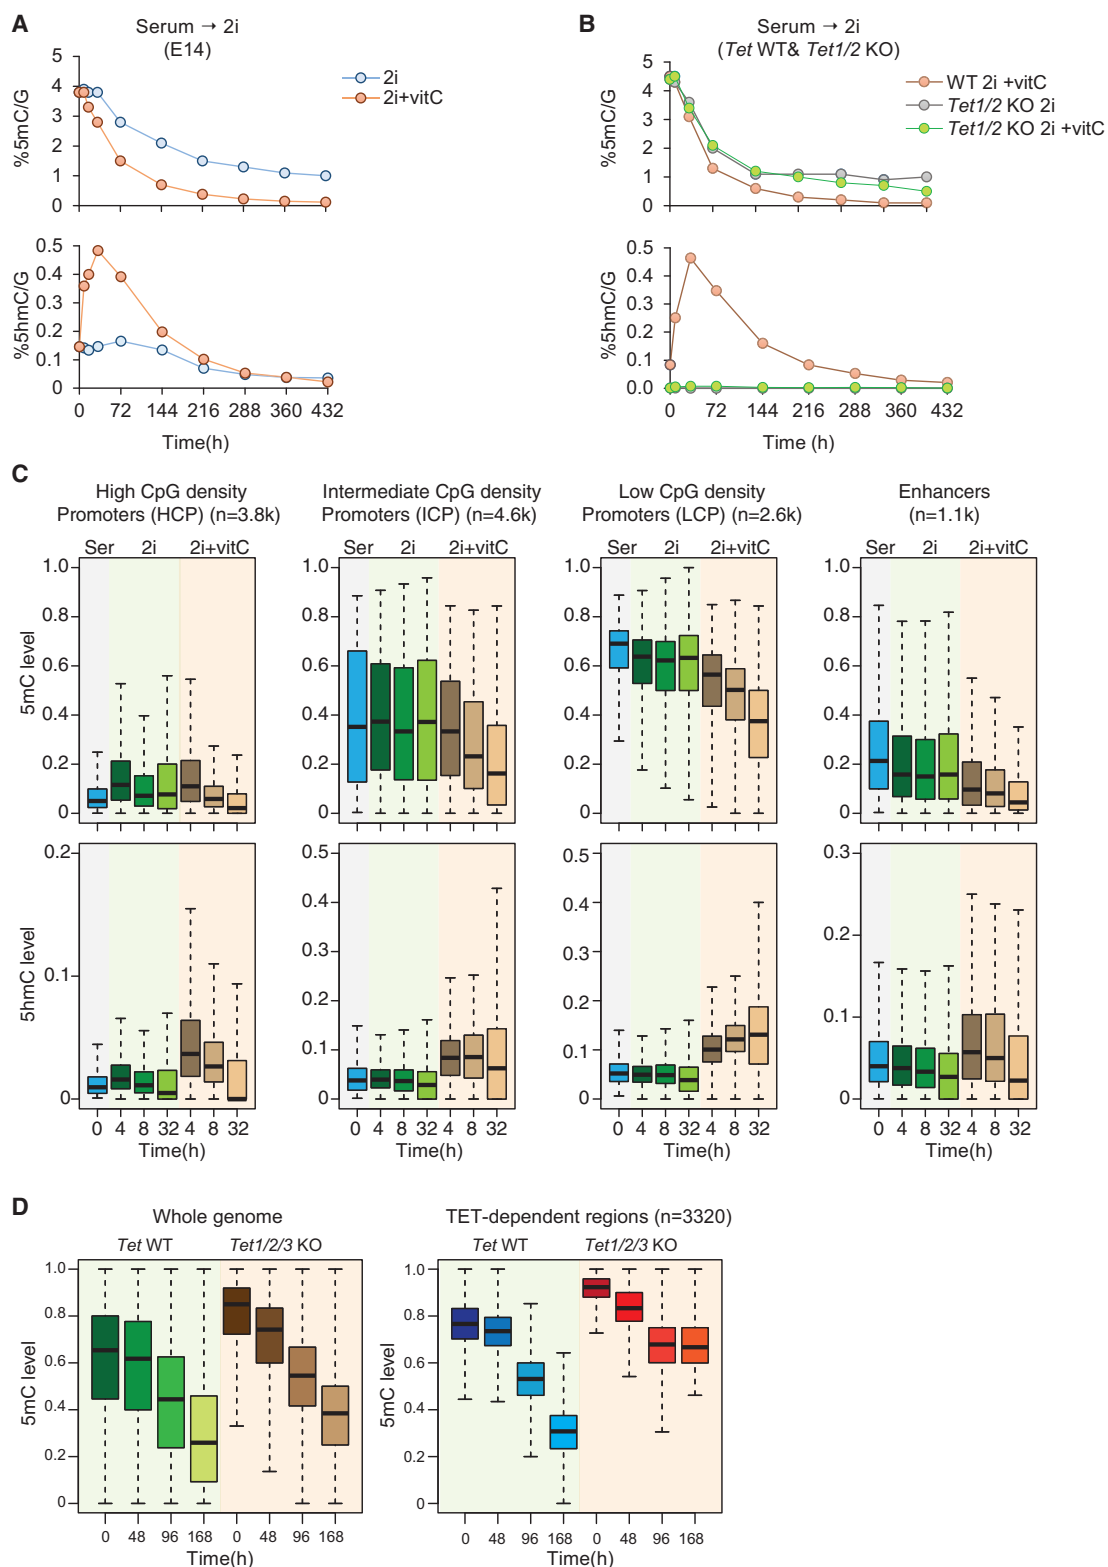

**Figure 3. TET-Dependent Demethylation Dynamics during Reprogramming of Serum-to-2i ESCs**

(A) Percentage of 5mC (top) and 5hmC (bottom) as measured by LC-MS in E14 during serum-to-2i transition in the absence (blue line) or presence of vitC (red line). Error bars indicate mean  $\pm$  SD from three biological replicates.

(legend continued on next page)

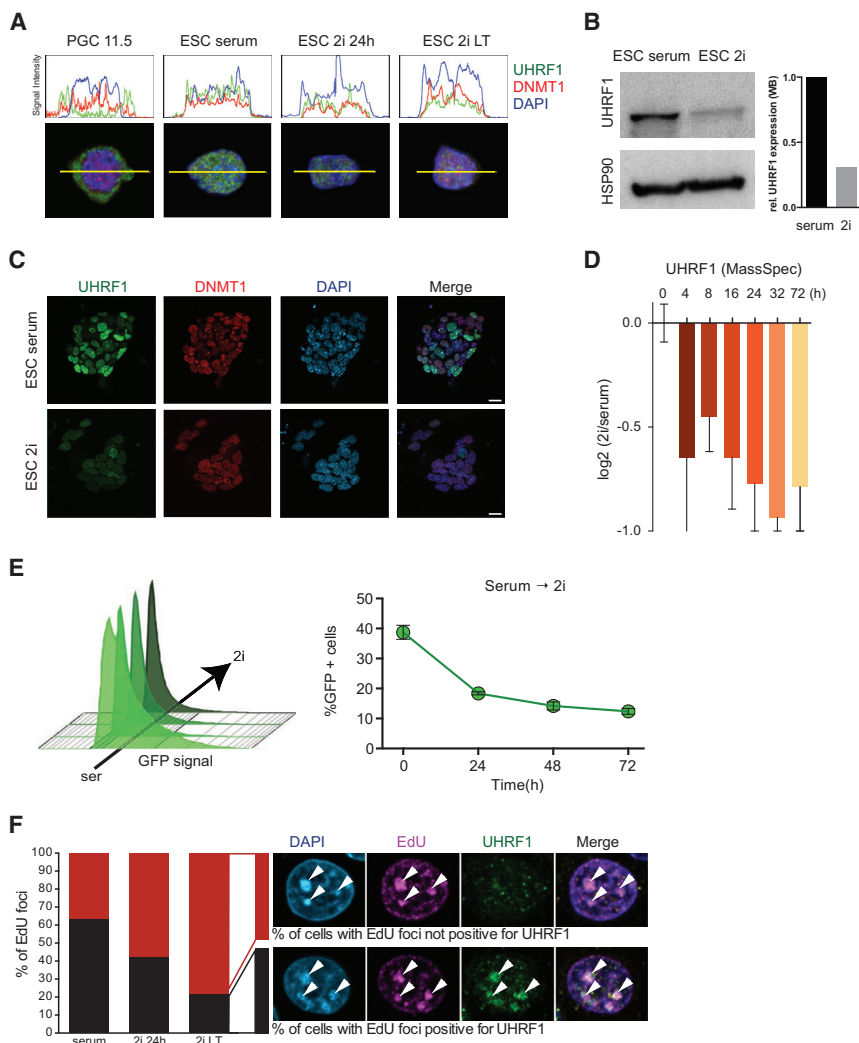

**Figure 4. UHRF1 Is Regulated at the Protein Level in 2i**

(A) Cellular localization of UHRF1 (green) and DNMT1 (red) in mouse PGCs (E11.5), serum ESCs, 24-hr 2i ESCs, and long-term (LT) 2i ESCs. DAPI (blue) labels the nucleus. The RGB profiles show the signal intensity for each pixel along the horizontal yellow line.

(B) Western blot analysis for UHRF1 protein in serum and LT 2i ESCs. Relative quantifications of the signal intensities of the bands on the western blot are shown in the bar chart.

(C) Immunofluorescence staining for UHRF1 (green), DNMT1 (red) and DAPI (blue) in serum and LT 2i ESCs. Scale bar represents 20  $\mu$ m.

(D) Protein levels of UHRF1 detected by protein mass spectrometry (label-free quantification [LFQ]) at different time points during serum-to-2i conversion, relative to serum ESCs. Error bars indicate mean  $\pm$  SD from two biological replicates.

(E) FACS analysis of UHRF1-GFP fusion protein in ESCs during serum-to-2i conversion. Histograms show the GFP signal intensity at different time points during the conversion. The black arrow depicts the threshold used to quantify the percentage of GFP+ cells, shown in the line graph. Error bars indicate mean  $\pm$  SD from three biological replicates.

(F) Percentage of replication foci with co-localization of UHRF1 in serum, 24-hr 2i and LT 2i ESCs. Images from serum ESCs showing examples for the two quantified states; arrows indicate EdU+ replication foci.

See also Figure S4.

2014) human ESCs by immunofluorescence (IF). Similar to our observations in mouse ESCs, *UHRF1* and *DNMT1* mRNA levels are not changed between the two states (Figure S4F), but UHRF1 protein levels were significantly reduced ( $\sim$ 2-fold reduced) in the naive cells (Figure S4G), pointing to a conserved regulation of UHRF1 in naive ESCs.

#### UHRF1 Recruitment to Replication Foci Is Impaired in 2i ESCs

The rapid, though not complete, loss of UHRF1 protein in 2i conditions prompted us to ask whether recruitment of the DNA

maintenance methylation machinery to the replication forks was impaired. Previous IF experiments in cells lacking *Uhrf1* proved that the presence of UHRF1 is absolutely required for recruitment of DNMT1 to replication foci (Sharif et al., 2007). We labeled replication foci by incubating serum or 2i ESCs for 8 min prior to fixation with 5-ethynyl-2'-deoxyuridine (EdU), which is incorporated into newly synthesized DNA. Co-staining for UHRF1 and EdU allowed us to count the number of cells with EdU-positive foci for co-localization of UHRF1 with replication foci. While UHRF1 co-localizes with EdU-positive replication foci in the majority of cells in serum conditions, this number is significantly reduced under 2i conditions (Figure 4F). The recruitment of UHRF1 to EdU-positive replication foci is further reduced with time in 2i. These results suggest that DNA demethylation

(B) Percentage of 5mC (top) and 5hmC (bottom) as measured by LC-MS in *Tet1/2* KO during serum-to-2i transition in the absence (gray line) or presence of vitC (green line). Error bars indicate mean  $\pm$  SD from three biological replicates.

(C) Distribution of 5mC (top) and 5hmC levels (bottom) during the first 32 hr of reprogramming from serum (gray) to 2i (green) or 2i+vitC (orange) measured by WGBS and TAB-seq over high-CpG promoters (HCP), intermediate-CpG promoters (ICP), low-CpG promoters (LCP) and enhancers. For each class of genomic element, only the subset having 5hmC enrichment in serum ( $T = 0$  hr) was considered. The horizontal line within the box plots represents the median.

(D) Average methylation levels over 500-bp tiles in *Tet1/2/3* KO cells and corresponding control cells (*Tet* WT). Tet-dependent regions were identified using k-means clustering.

See also Figure S3 and Table S2.



in the serum-to-2i conversion is a consequence of impaired DNA methylation maintenance through impaired recruitment of DNMT1 by UHRF1 to the replication fork.

### H3K9me2 Is Reduced in 2i ESCs

The drastic impairment of recruitment of UHRF1 to replication sites was surprising, as the levels of UHRF1 were reduced albeit still detectable in 2i conditions. The recruitment of UHRF1 depends on the recognition of both hemimethylated CpGs via its SRA domain and of methylated lysine 9 on histone 3 (H3K9) through its Tudor domain (Citterio et al., 2004; Karagianni et al., 2008; Rothbart et al., 2012). Loss of H3K9 methyltransferase G9a results in loss of global DNA methylation (Zhang et al., 2016), and similarly, it has been concluded that loss of H3K9 methylation, in particular H3K9me2, is an additional key step leading to genome-wide demethylation in PGCs (Kurimoto et al., 2015). H3K9me3 localization is relatively unchanged between serum and 2i ESCs and mainly enriched at repetitive elements (Marks et al., 2012), but the importance of loss of H3K9me2 is not clear (Walter et al., 2016). We found a significant reduction in the levels of H3K9me2 upon serum-to-2i conversion (~2-fold reduction) (Figures 5A, 5B, and S5A). Interestingly, loss of H3K9me2 was rapid, and we detected a weak correlation by IF between the global levels of H3K9me2 and DNA methylation in serum ESCs (Figure 5C), in line with the notion that H3K9me2-dependent recruitment of UHRF1 plays a key role in DNA methylation maintenance in ESCs, possibly explaining the drastic impairment of recruitment of UHRF1 to the replication foci.

To understand any locus-specific effects of the loss of H3K9me2, we performed H3K9me2 chromatin immunoprecipitation sequencing (ChIP-seq) analysis. While the overall pattern of H3K9me2 enrichment did not change during the serum-to-2i conversion, regions with low H3K9me2 enrichment further flattened out (Figure S5B). To correlate the presence of H3K9me2 with the levels of 5mC, we performed H3K9me2 chromatin immunoprecipitation followed by bisulfite sequencing (ChIP-BS-seq) (Brinkman et al., 2012). The 5mC levels in serum ESCs as well as 2i ESCs were significantly increased in the H3K9me2-bound DNA when compared to corresponding input samples (Figure 5D). We then divided the genome into regions with high or low H3K9me2 enrichment and found a significant increase in the 5mC levels at H3K9me2-high regions (Figure 5E).

Next, we generated RRBS libraries of *Uhrf1*<sup>-/-</sup> and corresponding wild-type control ESCs during the serum-to-2i conversion (Figure S5C) to identify regions that are only maintained in the presence of UHRF1. Computational analyses of these and E14, *Tet1/2/3* KO, and wild-type control lines identified a number of genomic regions resistant to DNA demethylation in wild-type cells, but not upon deletion of *Uhrf1* (Figure S5D; blue cluster), indicating strong locus specific recruitment. These regions are enriched for H3K9me2 in 2i ESCs and for H3K9me3 in 2i and serum ESCs (Figures S5E and 5F). We next measured 5mC levels over H3K9me2- (Figure 5F) and H3K9me3-enriched (Figure S5G) regions (Marks et al., 2012) and found that these regions retain high levels of DNA methylation in 2i ESCs in an UHRF1-dependent manner.

Finally, we asked how H3K9me2 levels were regulated during the serum-to-2i conversion. We quantified mRNA levels of key

H3K9 methylases and demethylases by RNA-seq (Figure S5H) and protein levels by mass spectrometry (Figure 5G). Interestingly, we found that several H3K9 demethylases, including KDM3A, KDM3B, and KDM4A, were upregulated specifically at the protein level in 2i conditions. Conversely, a number of H3K9 methylases, such as EHMT1 (GLP) and EHMT2 (G9A), were downregulated.

## DISCUSSION

Genome-wide DNA methylation erasure is a distinguishing epigenetic feature of preimplantation embryos (Guo et al., 2014; Smith et al., 2014; Wang et al., 2014), developing PGCs (Gkoutela et al., 2015; Guo et al., 2015; Hackett et al., 2013b; Seisenberger et al., 2012; Tang et al., 2015), and naive ESCs (Ficz et al., 2013; Habibi et al., 2013; Leitch et al., 2013; Takashima et al., 2014). Here, we have developed a mathematical model that is able to accurately estimate 5mC levels and the individual activity of the three main pathways relevant to DNA methylation dynamics ( $p_1$ , de novo;  $p_2$ , maintenance; and  $p_3$ , active demethylation) and predicts with great accuracy corresponding 5hmC kinetics in all instances of global epigenetic reprogramming. Validation of the model in different mutant ESC lines during serum-to-2i conversion demonstrates the power and the high prediction accuracy of the algorithm. Using methylation levels (5mC) from previously published datasets for migratory PGCs (E6.5–E11.5) (Seisenberger et al., 2012) and preimplantation embryos (two-cell stage to E4) (Okamoto et al., 2016; Wang et al., 2014), we have estimated the in vivo activity of the DNA methylation pathways and the dynamics of 5hmC levels during these phases of global DNA demethylation (Figures 6A and S6). All examples of global demethylation in the mouse can hence be accurately modeled and the predicted activities of the three pathways are mirrored by the levels and regulation of the enzymes and factors involved (where this is known). This leads to a unified view of genome-wide demethylation mechanisms.

In all instances of epigenetic reprogramming, global methylation is lost in a replication-dependent manner as a consequence of impaired maintenance methylation ( $p_2$ ). The individual maintenance activity dictates the rate of global demethylation, which is fastest in PGCs, where the rate of demethylation is almost as fast as that brought about by complete loss of maintenance methylation (*Dnmt1* KO ESCs). This result agrees with the observations made in preimplantation embryos, where an oocyte-specific cytoplasmic DNMT1 isoform is predominantly expressed and the somatic DNMT1 isoform is only expressed at low levels, but shows some activity, in particular at imprinted regions (Cirio et al., 2008; Dean, 2008; Hirasawa et al., 2008). Similar to 2i ESCs, the model predicts a significant impairment of de novo methylation in preimplantation embryos and migratory PGCs ( $p_1$ , ~10- and 30-fold reduction in activity) when compared to the steady-state levels found in serum ESCs. This is in agreement with substantial downregulation of DNMT3A/B in PGCs (Hackett et al., 2013b; Seisenberger et al., 2012; Wu and Zhang, 2014) and naive ESCs (Ficz et al., 2013; Habibi et al., 2013) and suggests that de novo methylation is not active prior to E4 in early embryos and the expression of de novo DNMTs is only needed for

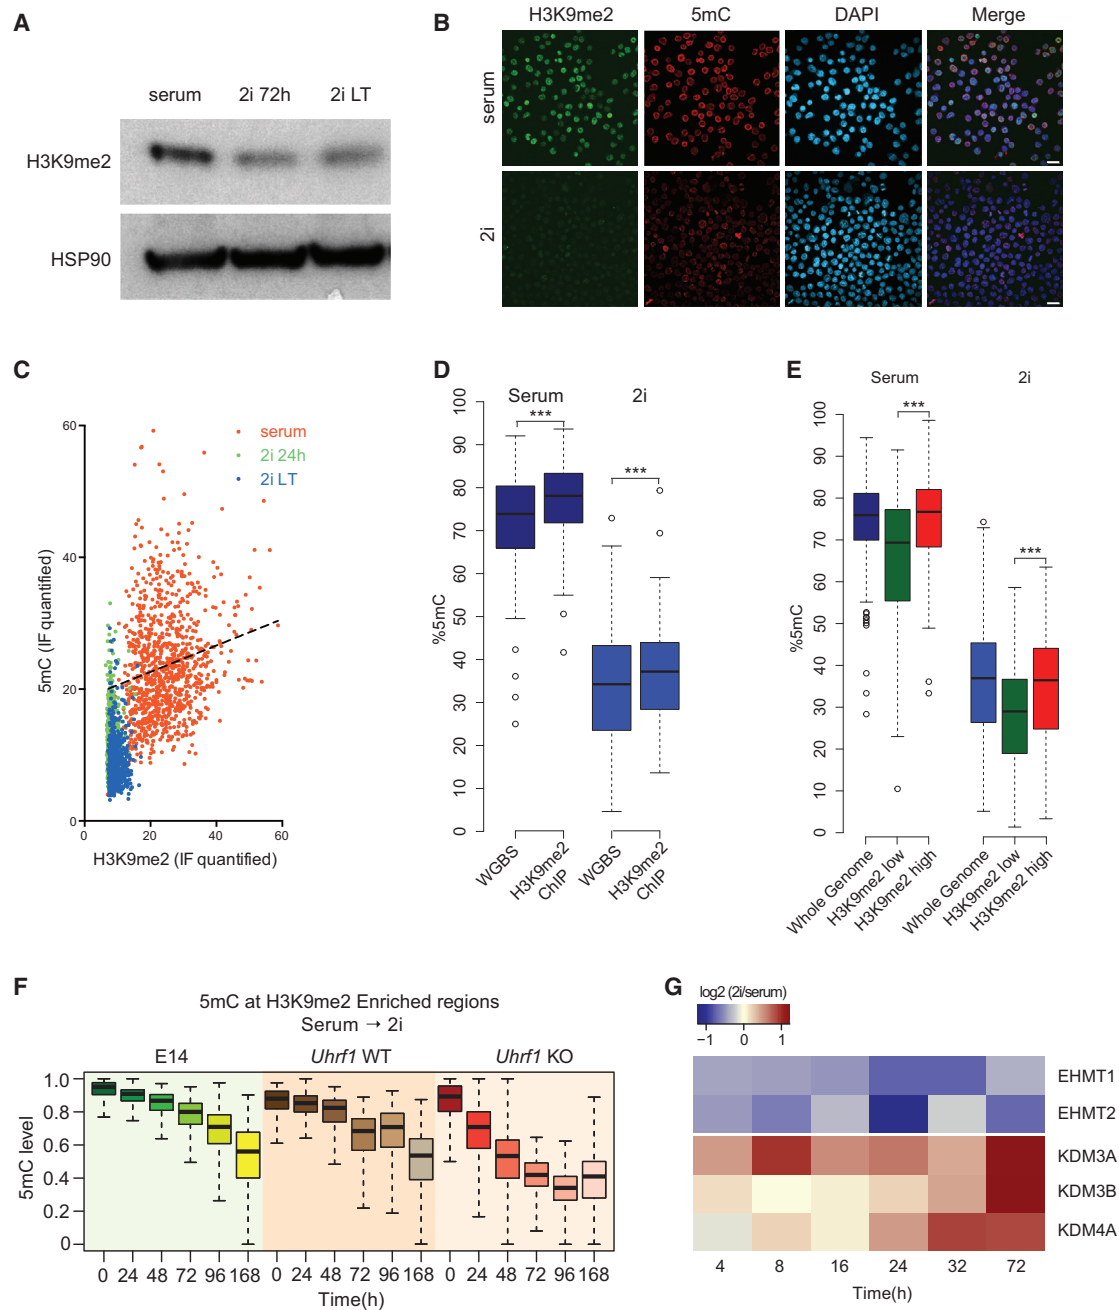

### Figure 5. H3K9me2 Is Rapidly Reduced in 2i ESCs

(A) Western blot analysis for H3K9me2 in serum and 2i ESCs.

(B) Immunofluorescence staining for H3K9me2 (green), 5mC (red) and DAPI (blue) in serum and LT 2i ESCs. Scale bar represents 20  $\mu$ m.

(C) Correlation of the quantified signals of H3K9me2 and 5mC in immunofluorescence staining of serum, 24-hr 2i, and LT 2i ESCs. The dashed line represents the linear regression between H3K9me2 and 5mC signals in serum ESCs.

(D) 5mC levels in H3K9me2-bound DNA and corresponding input samples from serum and LT 2i ESCs, measured by H3K9me2-ChIP-BS-seq.

(E) 5mC levels in regions with high or low H3K9me enrichment in serum and LT 2i ESCs.

(F) Levels of 5mC, determined by RRBS at H3K9me2 enriched regions during the serum-2i transition in E14, *Uhrf1* WT, and *Uhrf1* KO ESCs.

(G) Relative protein levels of known H3K9 modifiers detected by protein mass spectrometry (label-free quantification [LFQ]) at different time points during serum-to-2i conversion. Levels are normalized to serum ESCs.

Student's t test was performed for the indicated comparisons (\*\*\*)  $p < 0.001$ .

See also Figure S5.

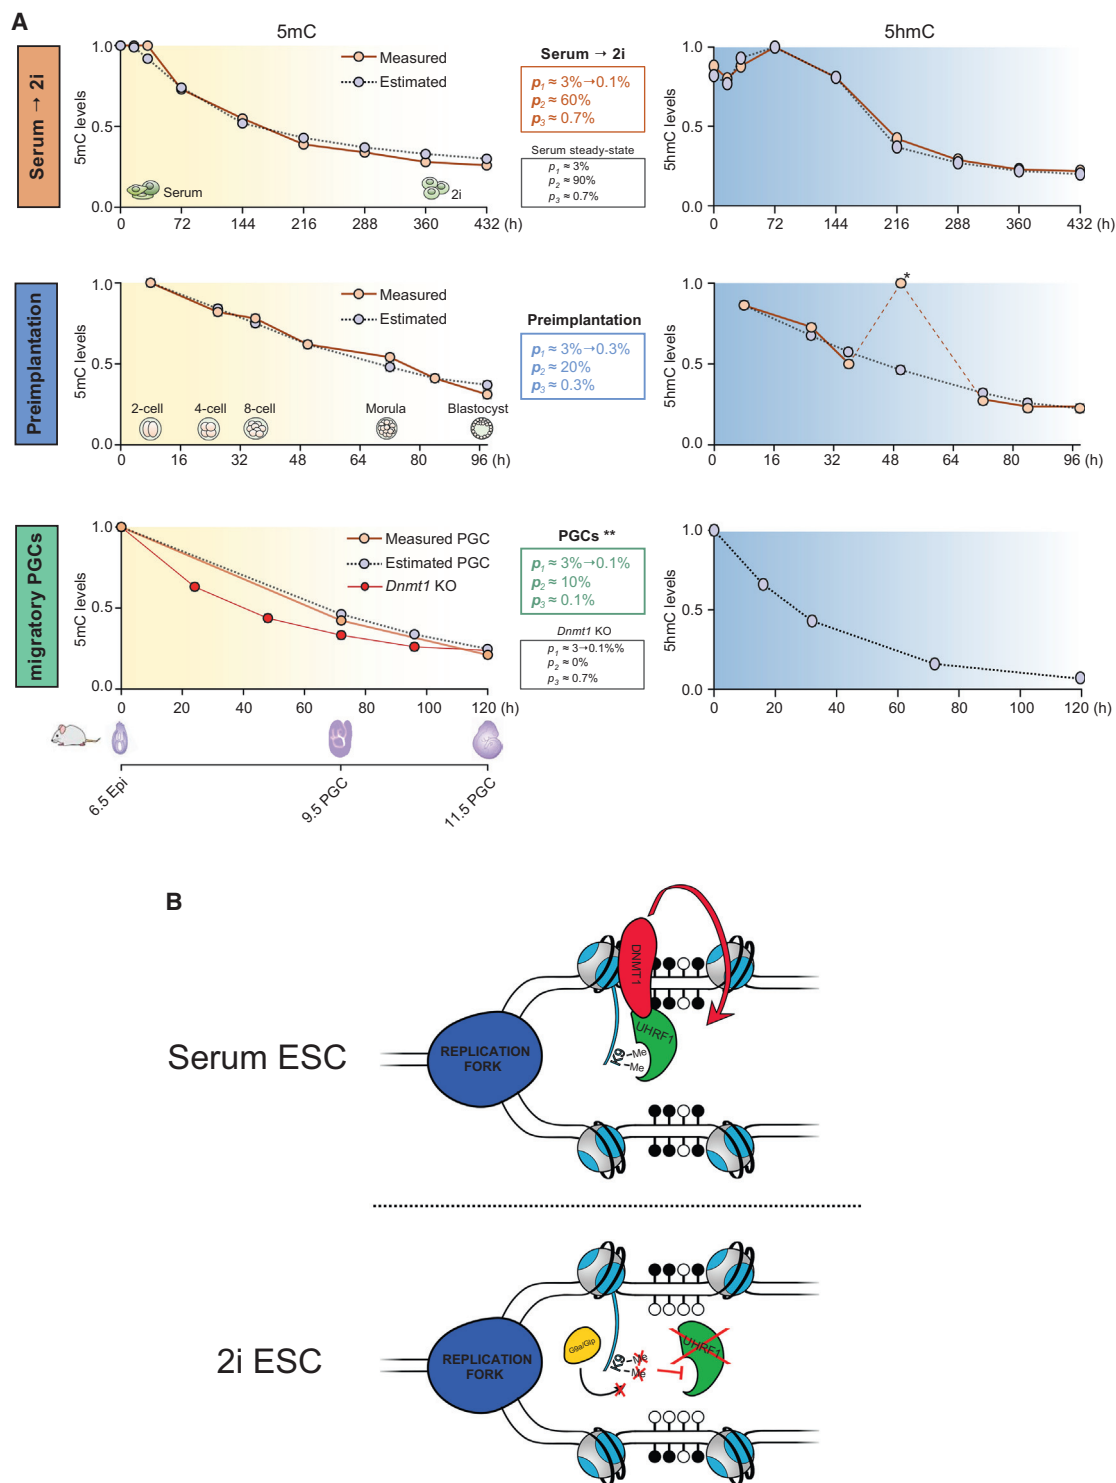

**Figure 6. Dual Regulation of DNA Demethylation during Serum-2i Transition**

(A) Mathematical modeling of serum-2i transition, preimplantation development, and migratory PGC demethylation. The model estimates the activity of the main pathways related to DNA methylation dynamics, i.e., de novo methylation ( $p_1$ ), maintenance methylation ( $p_2$ ), and active demethylation ( $p_3$ ). The first column shows measured (solid lines) and estimated (dotted lines) global levels 5mC (values have been scaled) during serum-2i transition, preimplantation development, and migratory PGC demethylation. The second column summarizes the estimated activities of the three pathways in each condition. The steady-state activities in serum ESCs are included as a comparison. The third column shows the predicted (dotted lines) global 5hmC values (scaled) and, if available, also measured (solid lines) 5hmC levels. \*The mathematical modeling did not predict a peak of global 5hmC levels in eight-cell embryos (Okamoto et al., 2016). \*\*Global 5mC dynamics (legend continued on next page)

remethylation in the epiblast (Guenatri et al., 2013; Hirasawa et al., 2008). Finally, the importance of active demethylation ( $\rho_3$ ) for global loss of DNA methylation is estimated to be very low in all instances of epigenetic reprogramming. The 5hmC predictions of the model recapitulate 5hmC dynamics in ESCs and in preimplantation embryos (with the exception of a reported peak at the eight-cell stage) and also predict 5hmC dynamics in PGCs (Figures 6A and S6). Noteworthy, the dynamics in migratory PGCs can be explained by two solutions, which both accurately mimic 5mC levels but predict different 5hmC dynamics. One solution predicts that both maintenance methylation and TET activity are strongly reduced (“impaired maintenance methylation”) (Figure 6A), while the second solution predicts that maintenance methylation is only ~2-fold reduced and TET activity is high (“TET-dependent demethylation”) (Figure S6). In mouse PGCs, UHRF1 levels are significantly decreased and high levels of hemi-methylated CpG dyads were found (Seisenberger et al., 2012), both supporting a strong impairment of maintenance methylation. In addition, loss of H3K9me2 was reported in in vivo and in vitro PGCs (Kurimoto et al., 2015; Seki et al., 2005) and knockdown of *Tet1* and *2* did not affect global DNA demethylation in vitro (Vincent et al., 2013). Thus, we reason that the “impaired maintenance methylation” model (Figure 6A) faithfully recapitulates the in vivo situation.

Mechanistically, we have dissected the different pathways relevant to DNA methylation dynamics in primed (serum) and naive (2i) ESCs (Wu and Zhang, 2014) and shown that global demethylation is, contrary to previous assumptions, a consequence of neither loss of de novo methylation nor active Tet-dependent demethylation but caused by impaired maintenance methylation. DNMT1 is recruited to the replication fork through UHRF1, which itself interacts with both hemimethylated CpG dyads and methylated H3K9 and loss of either interaction impairs recruitment (Liu et al., 2013). In naive mouse and human ESCs, protein levels of UHRF1 are reduced, limiting the recruitment of DNMT1. In addition, loss of H3K9me2 further reduces UHRF1 recruitment and in turn impairs DNA methylation maintenance by DNMT1 (Figure 6B). UHRF1 is regulated at the protein level in human and mouse ESCs, as well as in human and mouse PGCs (Gkountela et al., 2015; Pastor et al., 2016; Seisenberger et al., 2012; Tang et al., 2015). Interestingly, in mouse PGCs there is also transcriptional silencing of *Uhrf1* (Kurimoto et al., 2015; Magnúsdóttir et al., 2013; Nakaki et al., 2013; Seisenberger et al., 2012), which may well underlie the considerably faster demethylation kinetics in mouse PGCs when compared to naive ESCs. Hence, several pathways have apparently evolved that modulate maintenance methylation by controlling UHRF1 activity at different levels. The additional level of transcriptional regulation in mouse PGCs suggests that the short time frame of epigenetic resetting in the mouse germline necessitated an additional regulatory layer, ensuring almost complete impairment of

maintenance methylation and thus rapid demethylation (Figure 6A). This is in contrast to human PGCs, where demethylation occurs with slower, potentially intra-individual-specific kinetics (von Meyenn and Reik, 2015).

In addition to the reduction of UHRF1 protein levels, the signaling changes imposed by 2i in ESCs (MAPK and GSK3 signaling inhibition) elicit a decrease in the levels of H3K9me2, thereby synergistically driving genome-wide DNA demethylation, while allowing methylation maintenance of specific genomic loci. This regulation of H3K9me2 is also evident in PGCs, with apparent loss of H3K9me2 in mouse (Kurimoto et al., 2015; Seki et al., 2005) and human PGCs (Tang et al., 2015). We found that regions with high levels of H3K9me2 in naive ESCs are also characterized by higher level of DNA methylation (Figure 5F) and regions resistant to DNA demethylation in the presence of UHRF1 show significant enrichment of H3K9me2 (Figure S5E). We propose that in the face of global demethylation, locus-specific enrichment of H3K9me2/3 allows DNA methylation maintenance at specific regions via recruitment of UHRF1. Similarly, while TET enzymes were dispensable for global epigenetic reprogramming, TET-dependent demethylation was evident at a limited number of specific loci. WGBS and TAB-seq experiments revealed that active demethylation is restricted to a small proportion of the genome, predominantly including active promoters and enhancers.

Taken together, loss of DNA methylation in ESCs, PGCs, and preimplantation embryos is the result of the concerted regulation of two pathways, namely reduction of UHRF1 protein levels and global loss of H3K9me2, thereby impairing recruitment of DNMT1 to the replication fork. This elegant mechanism facilitates the maintenance of methylation at specific loci while the genome is simultaneously demethylated on a global scale.

## EXPERIMENTAL PROCEDURES

### Cell Culture

Mouse ESCs were cultured in the presence of LIF in DMEM containing 15% fetal calf serum. A tamoxifen-inducible Cre recombinase was used to induce recombination of *loxP* sites in the floxed cell lines 48 hr prior to the experiment. For serum-to-2i transition, serum medium was replaced by serum-free N2B27 supplemented with LIF, mitogen-activated protein kinase kinase (MEK) inhibitor PD0325901 (1  $\mu$ M), and GSK3 inhibitor CHIR99021 (3  $\mu$ M).

### Mass Spectrometry of Nucleosides

Mass spectrometry of nucleosides was performed as previously described (Ficz et al., 2013; Kroeze et al., 2014). Briefly, 150–1,000 ng genomic DNA was digested using DNA Degradase Plus (Zymo Research) according to the manufacturer’s instructions and analyzed by liquid chromatography-tandem mass spectrometry.

### Next-Generation Sequencing

WGBS, RRBS, and TAB-seq were performed as described previously (Lister et al., 2008; Smallwood et al., 2011; Yu et al., 2012). Whole-genome hairpin

in migratory PGCs can be explained by two solutions of the mathematical model. The first solution is shown here and the second solution is shown in Figure S6.

(B) Cartoon representation of the proposed model. In serum cells, UHRF1 is recruited to replication foci by binding to hemi-methylated DNA and H3K9me2 chromatin marks. Switching to 2i conditions results in passive loss of 5mC driven by a multilayer of regulation: downregulation of UHRF1 at the protein level, and loss of H3K9me2, which results in impaired recruitment to replication foci.

See also Figure S6.

bisulfite sequencing was performed as described previously (Zhao et al., 2014). Chromatin immunoprecipitation of serum and 2i ESCs was performed using anti-H3K9me2 antibodies (Abcam, ab1220). Eluted DNA was then used for ChIP-seq library preparation using the MicroPlex Library Preparation Kit v2 (Diagenode) or alternatively treated as WGBS samples as described above.

See also [Supplemental Experimental Procedures](#).

## ACCESSION NUMBERS

The accession numbers for the next-generation-sequencing data reported in this study are GEO: GSE70724 and GEO: GSE77420.

## SUPPLEMENTAL INFORMATION

Supplemental Information includes Supplemental Experimental Procedures, six figures, and two tables and can be found with this article online at <http://dx.doi.org/10.1016/j.molcel.2016.04.025>.

## AUTHOR CONTRIBUTIONS

F.v.M., M.I., and E.H. performed the experiments, analyzed the data, and carried out bioinformatics analysis. F.S. performed immunofluorescence experiments and analysis. E.P. carried out bioinformatics analysis. N.Q.L. performed proteomic analysis. E.H. and A.S.Y. performed mathematical modeling. M.Y. and C.H. prepared WGBS and TAB-seq libraries. Z.X. and H.X. performed hairpin-bisulfite library preparation. I.M. generated *Aicda*<sup>-/-</sup> cells, and T.B.N. generated *Dnmt3a*<sup>fl/fl</sup>, *3b*<sup>fl/fl</sup> cells. L.I.K. and J.H.J. performed 5mC/5hmC LC-MS analysis. F.v.M., M.I., E.H., H.G.S., and W.R. designed the experiments and wrote the manuscript. H.G.S. and W.R. provided supervision.

## ACKNOWLEDGMENTS

We thank members of the molecular biology department and the epigenetics ISP for discussions; Colin Logie, Arjen Brinkman, and Wendy Dean for critical reading of the manuscript; and the sequencing team and Kristina Tabbada for NGS. We thank David Oxley for mass spectrometry analysis of nucleosides, Felix Krueger and Simon Andrews for help with bioinformatics analysis, and Melanie Eckersley-Maslin for help with microscopy. The computational modeling analyses were carried out on the Dutch national e-infrastructure with the support of SURF Foundation. Haruhiko Koseki provided *Dnmt1*<sup>fl/fl</sup>, *Uhrf1*<sup>fl/fl</sup> cells, Gouliang Xu *Tet1*<sup>1-/-, 2-/-, 3-/-</sup> cells, Meelad Dawlaty and Rudolf Jaenisch *Tet1*<sup>1-/-, 2-/-</sup> cells, Primo Schär *Tdg*<sup>-/-</sup> cells, and Austin Smith human naive H9 cells. HGS is supported by CEU-ERC Advanced Grant SystemCell (No. 339431). C.H. is supported by National Institutes of Health (R01 HG006827). C.H. is an investigator of the Howard Hughes Medical Institute, and M.Y. is a Howard Hughes Medical Institute International Predoctoral Fellow. H.X. is supported by the VBI new faculty startup fund. W.R. is supported by the BBSRC (BB/K010867/1), the Wellcome Trust (095645/Z/11/Z), EU BLUEPRINT, and EpiGeneSys. M.I. is supported by the People Programme (Marie Curie Actions) of the European Union's Seventh Framework Programme FP7. F.v.M. is a Postdoctoral Fellow of the Swiss National Science Foundation (SNF)/Novartis SNF. W.R. is a consultant and shareholder of Cambridge Epigenetix.

Received: February 5, 2016

Revised: April 4, 2016

Accepted: April 21, 2016

Published: May 26, 2016; corrected online: June 16, 2016

## REFERENCES

Arand, J., Spieler, D., Karius, T., Branco, M.R., Meilinger, D., Meissner, A., Jenuwein, T., Xu, G., Leonhardt, H., Wolf, V., and Walter, J. (2012). In vivo control of CpG and non-CpG DNA methylation by DNA methyltransferases. *PLoS Genet.* 8, e1002750.

Blaschke, K., Ebata, K.T., Karimi, M.M., Zepeda-Martínez, J.A., Goyal, P., Mahapatra, S., Tam, A., Laird, D.J., Hirst, M., Rao, A., et al. (2013). Vitamin C induces Tet-dependent DNA demethylation and a blastocyst-like state in ES cells. *Nature* 500, 222–226.

Bonapace, I.M., Latella, L., Papait, R., Nicassio, F., Sacco, A., Muto, M., Crescenzi, M., and Di Fiore, P.P. (2002). Np95 is regulated by E1A during mitotic reactivation of terminally differentiated cells and is essential for S phase entry. *J. Cell Biol.* 157, 909–914.

Brinkman, A.B., Gu, H., Bartels, S.J.J., Zhang, Y., Matarese, F., Simmer, F., Marks, H., Bock, C., Gnirke, A., Meissner, A., and Stunnenberg, H.G. (2012). Sequential ChIP-bisulfite sequencing enables direct genome-scale investigation of chromatin and DNA methylation cross-talk. *Genome Res.* 22, 1128–1138.

Canham, M.A., Sharov, A.A., Ko, M.S.H., and Brickman, J.M. (2010). Functional heterogeneity of embryonic stem cells revealed through translational amplification of an early endodermal transcript. *PLoS Biol.* 8, e1000379.

Chung, T.-L., Brena, R.M., Kolle, G., Grimmond, S.M., Berman, B.P., Laird, P.W., Pera, M.F., and Wolvetang, E.J. (2010). Vitamin C promotes widespread yet specific DNA demethylation of the epigenome in human embryonic stem cells. *Stem Cells* 28, 1848–1855.

Cirio, M.C., Ratnam, S., Ding, F., Reinhart, B., Navara, C., and Chaillet, J.R. (2008). Preimplantation expression of the somatic form of Dnmt1 suggests a role in the inheritance of genomic imprints. *BMC Dev. Biol.* 8, 9.

Citterio, E., Papait, R., Nicassio, F., Vecchi, M., Gomiero, P., Mantovani, R., Di Fiore, P.P., and Bonapace, I.M. (2004). Np95 is a histone-binding protein endowed with ubiquitin ligase activity. *Mol. Cell. Biol.* 24, 2526–2535.

Dean, W. (2008). The elusive Dnmt1 and its role during early development. *Epigenetics* 3, 175–178.

Ficz, G., Hore, T.A., Santos, F., Lee, H.J., Dean, W., Arand, J., Krueger, F., Oxley, D., Paul, Y.-L., Walter, J., et al. (2013). FGF signaling inhibition in ESCs drives rapid genome-wide demethylation to the epigenetic ground state of pluripotency. *Cell Stem Cell* 13, 351–359.

Geneux, D.P., Miner, B.E., Bergstrom, C.T., and Laird, C.D. (2005). A population-epigenetic model to infer site-specific methylation rates from double-stranded DNA methylation patterns. *Proc. Natl. Acad. Sci. USA* 102, 5802–5807.

Gkoutela, S., Zhang, K.X., Shafiq, T.A., Liao, W.-W., Hargan-Calvopiña, J., Chen, P.-Y., and Clark, A.T. (2015). DNA demethylation dynamics in the human prenatal germline. *Cell* 161, 1425–1436.

Guenatri, M., Duffié, R., Iranzo, J., Fauque, P., and Bourc'his, D. (2013). Plasticity in Dnmt3L-dependent and -independent modes of de novo methylation in the developing mouse embryo. *Development* 140, 562–572.

Guo, H., Zhu, P., Yan, L., Li, R., Hu, B., Lian, Y., Yan, J., Ren, X., Lin, S., Li, J., et al. (2014). The DNA methylation landscape of human early embryos. *Nature* 511, 606–610.

Guo, F., Yan, L., Guo, H., Li, L., Hu, B., Zhao, Y., Yong, J., Hu, Y., Wang, X., Wei, Y., et al. (2015). The transcriptome and DNA methylome landscapes of human primordial germ cells. *Cell* 161, 1437–1452.

Habibi, E., Brinkman, A.B., Arand, J., Kroeze, L.I., Kerstens, H.H.D., Matarese, F., Lepikhov, K., Gut, M., Brun-Heath, I., Hubner, N.C., et al. (2013). Whole-genome bisulfite sequencing of two distinct interconvertible DNA methylomes of mouse embryonic stem cells. *Cell Stem Cell* 13, 360–369.

Hackett, J.A., Dietmann, S., Murakami, K., Down, T.A., Leitch, H.G., and Surani, M.A. (2013a). Synergistic mechanisms of DNA demethylation during transition to ground-state pluripotency. *Stem Cell Reports* 1, 518–531.

Hackett, J.A., Sengupta, R., Zyllicz, J.J., Murakami, K., Lee, C., Down, T.A., and Surani, M.A. (2013b). Germline DNA demethylation dynamics and imprint erasure through 5-hydroxymethylcytosine. *Science* 339, 448–452.

Hirasawa, R., Chiba, H., Kaneda, M., Tajima, S., Li, E., Jaenisch, R., and Sasaki, H. (2008). Maternal and zygotic Dnmt1 are necessary and sufficient

- for the maintenance of DNA methylation imprints during preimplantation development. *Genes Dev.* 22, 1607–1616.
- Karagianni, P., Amazit, L., Qin, J., and Wong, J. (2008). ICBP90, a novel methyl K9 H3 binding protein linking protein ubiquitination with heterochromatin formation. *Mol. Cell. Biol.* 28, 705–717.
- Kobayashi, H., Sakurai, T., Imai, M., Takahashi, N., Fukuda, A., Yayoi, O., Sato, S., Nakabayashi, K., Hata, K., Sotomaru, Y., et al. (2012). Contribution of intragenic DNA methylation in mouse gametic DNA methylomes to establish oocyte-specific heritable marks. *PLoS Genet.* 8, e1002440.
- Kobayashi, H., Sakurai, T., Miura, F., Imai, M., Mochiduki, K., Yanagisawa, E., Sakashita, A., Wakai, T., Suzuki, Y., Ito, T., et al. (2013). High-resolution DNA methylome analysis of primordial germ cells identifies gender-specific reprogramming in mice. *Genome Res.* 23, 616–627.
- Kroeze, L.I., Aslanyan, M.G., van Rooij, A., Koorenhof-Scheele, T.N., Massop, M., Carell, T., Boezeman, J.B., Marie, J.-P., Halkes, C.J.M., de Witte, T., et al.; EORTC Leukemia Group and GIMEMA (2014). Characterization of acute myeloid leukemia based on levels of global hydroxymethylation. *Blood* 124, 1110–1118.
- Kurimoto, K., Yabuta, Y., Hayashi, K., Ohta, H., Kiyonari, H., Mitani, T., Moritoki, Y., Kohri, K., Kimura, H., Yamamoto, T., et al. (2015). Quantitative dynamics of chromatin remodeling during germ cell specification from mouse embryonic stem cells. *Cell Stem Cell* 16, 517–532.
- Leitch, H.G., McEwen, K.R., Turp, A., Encheva, V., Carroll, T., Grabole, N., Mansfield, W., Nashun, B., Knezovich, J.G., Smith, A., et al. (2013). Naive pluripotency is associated with global DNA hypomethylation. *Nat. Struct. Mol. Biol.* 20, 311–316.
- Lister, R., O'Malley, R.C., Tonti-Fillippini, J., Gregory, B.D., Berry, C.C., Millar, A.H., and Ecker, J.R. (2008). Highly integrated single-base resolution maps of the epigenome in *Arabidopsis*. *Cell* 133, 523–536.
- Liu, X., Gao, Q., Li, P., Zhao, Q., Zhang, J., Li, J., Koseki, H., and Wong, J. (2013). UHRF1 targets DNMT1 for DNA methylation through cooperative binding of hemi-methylated DNA and methylated H3K9. *Nat. Commun.* 4, 1563.
- Magnúsdóttir, E., Dietmann, S., Murakami, K., Günesdogan, U., Tang, F., Bao, S., Diamanti, E., Lao, K., Gottgens, B., and Azim Surani, M. (2013). A tripartite transcription factor network regulates primordial germ cell specification in mice. *Nat. Cell Biol.* 15, 905–915.
- Marks, H., Kalkan, T., Menafrá, R., Denissov, S., Jones, K., Hofemeister, H., Nichols, J., Kranz, A., Stewart, A.F., Smith, A., and Stunnenberg, H.G. (2012). The transcriptional and epigenomic foundations of ground state pluripotency. *Cell* 149, 590–604.
- Martello, G., and Smith, A. (2014). The nature of embryonic stem cells. *Annu. Rev. Cell Dev. Biol.* 30, 647–675.
- McGovern, A.P., Powell, B.E., and Chevassut, T.J.T. (2012). A dynamic multi-compartmental model of DNA methylation with demonstrable predictive value in hematological malignancies. *J. Theor. Biol.* 310, 14–20.
- Nakaki, F., Hayashi, K., Ohta, H., Kurimoto, K., Yabuta, Y., and Saitou, M. (2013). Induction of mouse germ-cell fate by transcription factors in vitro. *Nature* 501, 222–226.
- Nichols, J., and Smith, A. (2012). Pluripotency in the embryo and in culture. *Cold Spring Harb. Perspect. Biol.* 4, a008128.
- Okamoto, Y., Yoshida, N., Suzuki, T., Shimozawa, N., Asami, M., Matsuda, T., Kojima, N., Perry, A.C.F., and Takada, T. (2016). DNA methylation dynamics in mouse preimplantation embryos revealed by mass spectrometry. *Sci. Rep.* 6, 19134.
- Otto, S.P., and Walbot, V. (1990). DNA methylation in eukaryotes: kinetics of demethylation and de novo methylation during the life cycle. *Genetics* 124, 429–437.
- Pastor, W.A., Chen, D., Liu, W., Kim, R., Sahakyan, A., Lukianchikov, A., Plath, K., Jacobsen, S.E., and Clark, A.T. (2016). Naive human pluripotent cells feature a methylation landscape devoid of blastocyst or germline memory. *Cell Stem Cell* 18, 323–329.
- Pfeifer, G.P., Steigerwald, S.D., Hansen, R.S., Gartler, S.M., and Riggs, A.D. (1990). Polymerase chain reaction-aided genomic sequencing of an X chromosome-linked CpG island: methylation patterns suggest clonal inheritance, CpG site autonomy, and an explanation of activity state stability. *Proc. Natl. Acad. Sci. USA* 87, 8252–8256.
- Rothbart, S.B., Krajewski, K., Nady, N., Tempel, W., Xue, S., Badeaux, A.I., Barsyte-Lovejoy, D., Martinez, J.Y., Bedford, M.T., Fuchs, S.M., et al. (2012). Association of UHRF1 with methylated H3K9 directs the maintenance of DNA methylation. *Nat. Struct. Mol. Biol.* 19, 1155–1160.
- Seisenberger, S., Andrews, S., Krueger, F., Arand, J., Walter, J., Santos, F., Popp, C., Thienpont, B., Dean, W., and Reik, W. (2012). The dynamics of genome-wide DNA methylation reprogramming in mouse primordial germ cells. *Mol. Cell* 48, 849–862.
- Seki, Y., Hayashi, K., Itoh, K., Mizugaki, M., Saitou, M., and Matsui, Y. (2005). Extensive and orderly reprogramming of genome-wide chromatin modifications associated with specification and early development of germ cells in mice. *Dev. Biol.* 278, 440–458.
- Sharif, J., Muto, M., Takebayashi, S., Suetake, I., Iwamatsu, A., Endo, T.A., Shinga, J., Mizutani-Koseki, Y., Toyoda, T., Okamura, K., et al. (2007). The SRA protein Np95 mediates epigenetic inheritance by recruiting Dnmt1 to methylated DNA. *Nature* 450, 908–912.
- Singh, A.M., Hamazaki, T., Hankowski, K.E., and Terada, N. (2007). A heterogeneous expression pattern for Nanog in embryonic stem cells. *Stem Cells* 25, 2534–2542.
- Smallwood, S.A., Tomizawa, S., Krueger, F., Ruf, N., Carli, N., Segonds-Pichon, A., Sato, S., Hata, K., Andrews, S.R., and Kelsey, G. (2011). Dynamic CpG island methylation landscape in oocytes and preimplantation embryos. *Nat. Genet.* 43, 811–814.
- Smith, A.G. (2001). Embryo-derived stem cells: of mice and men. *Annu. Rev. Cell Dev. Biol.* 17, 435–462.
- Smith, Z.D., Chan, M.M., Humm, K.C., Karnik, R., Mekhoubad, S., Regev, A., Eggan, K., and Meissner, A. (2014). DNA methylation dynamics of the human preimplantation embryo. *Nature* 511, 611–615.
- Sontag, L.B., Lorincz, M.C., and Georg Luebeck, E. (2006). Dynamics, stability and inheritance of somatic DNA methylation imprints. *J. Theor. Biol.* 242, 890–899.
- Stadler, M.B., Murr, R., Burger, L., Ivanek, R., Lienert, F., Schöler, A., van Nimwegen, E., Wirbelauer, C., Oakeley, E.J., Gaidatzis, D., et al. (2011). DNA-binding factors shape the mouse methylome at distal regulatory regions. *Nature* 480, 490–495.
- Takashima, Y., Guo, G., Loos, R., Nichols, J., Ficzi, G., Krueger, F., Oxley, D., Santos, F., Clarke, J., Mansfield, W., et al. (2014). Resetting transcription factor control circuitry toward ground-state pluripotency in human. *Cell* 158, 1254–1269.
- Tang, F., Barbacioru, C., Bao, S., Lee, C., Nordman, E., Wang, X., Lao, K., and Surani, M.A. (2010). Tracing the derivation of embryonic stem cells from the inner cell mass by single-cell RNA-Seq analysis. *Cell Stem Cell* 6, 468–478.
- Tang, W.W.C., Dietmann, S., Irie, N., Leitch, H.G., Floros, V.I., Bradshaw, C.R., Hackett, J.A., Chinnery, P.F., and Surani, M.A. (2015). A Unique Gene Regulatory Network Resets the Human Germline Epigenome for Development. *Cell* 161, 1453–1467.
- Vincent, J.J., Huang, Y., Chen, P.-Y., Feng, S., Calvopiña, J.H., Nee, K., Lee, S.A., Le, T., Yoon, A.J., Faull, K., et al. (2013). Stage-specific roles for tet1 and tet2 in DNA demethylation in primordial germ cells. *Cell Stem Cell* 12, 470–478.
- von Meyenn, F., and Reik, W. (2015). Forget the parents: epigenetic reprogramming in human germ cells. *Cell* 161, 1248–1251.
- Walter, M., Teissandier, A., Pérez-Palacios, R., and Bourc'his, D. (2016). An epigenetic switch ensures transposon repression upon dynamic loss of DNA methylation in embryonic stem cells. *Elife* 5, <http://dx.doi.org/10.7554/eLife.11418>.

- Wang, L., Zhang, J., Duan, J., Gao, X., Zhu, W., Lu, X., Yang, L., Zhang, J., Li, G., Ci, W., et al. (2014). Programming and inheritance of parental DNA methylomes in mammals. *Cell* 157, 979–991.
- Weber, M., Hellmann, I., Stadler, M.B., Ramos, L., Pääbo, S., Rebhan, M., and Schübeler, D. (2007). Distribution, silencing potential and evolutionary impact of promoter DNA methylation in the human genome. *Nat. Genet.* 39, 457–466.
- Wu, H., and Zhang, Y. (2014). Reversing DNA methylation: mechanisms, genomics, and biological functions. *Cell* 156, 45–68.
- Yin, R., Mao, S.-Q., Zhao, B., Chong, Z., Yang, Y., Zhao, C., Zhang, D., Huang, H., Gao, J., Li, Z., et al. (2013). Ascorbic acid enhances Tet-mediated 5-methylcytosine oxidation and promotes DNA demethylation in mammals. *J. Am. Chem. Soc.* 135, 10396–10403.
- Ying, Q.-L., Wray, J., Nichols, J., Battle-Morera, L., Doble, B., Woodgett, J., Cohen, P., and Smith, A. (2008). The ground state of embryonic stem cell self-renewal. *Nature* 453, 519–523.
- Yu, M., Hon, G.C., Szulwach, K.E., Song, C.-X., Zhang, L., Kim, A., Li, X., Dai, Q., Shen, Y., Park, B., et al. (2012). Base-resolution analysis of 5-hydroxymethylcytosine in the mammalian genome. *Cell* 149, 1368–1380.
- Zhang, T., Termanis, A., Özkan, B., Bao, X.X., Culley, J., de Lima Alves, F., Rappsilber, J., Ramsahoye, B., and Stancheva, I. (2016). G9a/GLP complex maintains imprinted DNA methylation in embryonic stem cells. *Cell Rep.* 15, 77–85.
- Zhao, L., Sun, M.-A., Li, Z., Bai, X., Yu, M., Wang, M., Liang, L., Shao, X., Arnovitz, S., Wang, Q., et al. (2014). The dynamics of DNA methylation fidelity during mouse embryonic stem cell self-renewal and differentiation. *Genome Res.* 24, 1296–1307.

**Molecular Cell, Volume 62**

**Supplemental Information**

**Impairment of DNA Methylation Maintenance**

**Is the Main Cause of Global Demethylation**

**in Naive Embryonic Stem Cells**

**Ferdinand von Meyenn, Mario Iurlaro, Ehsan Habibi, Ning Qing Liu, Ali Salehzadeh-Yazdi, Fátima Santos, Edoardo Petrini, Inês Milagre, Miao Yu, Zhenqing Xie, Leonie I. Kroeze, Tatyana B. Nesterova, Joop H. Jansen, Hehuang Xie, Chuan He, Wolf Reik, and Hendrik G. Stunnenberg**



Figure S1

A

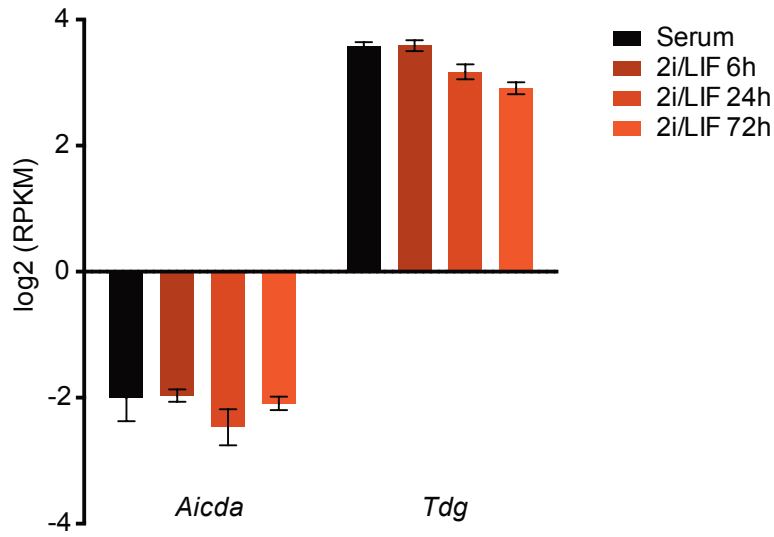

B

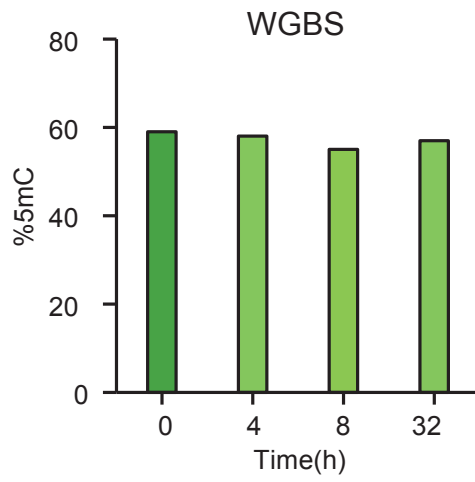

C

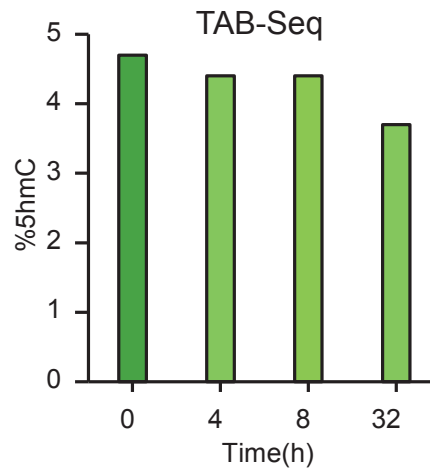

D

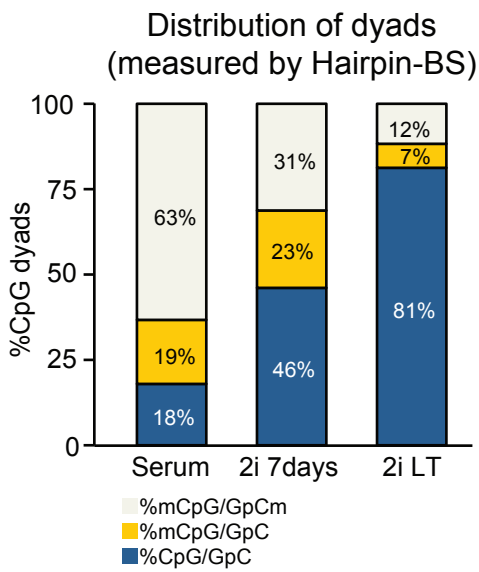

E

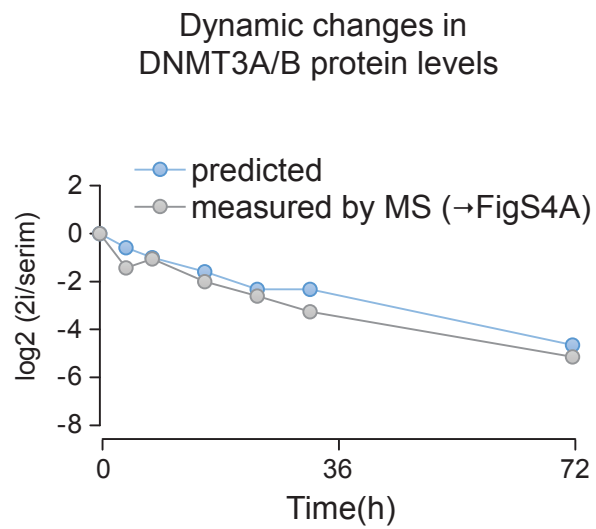

Figure S2

A

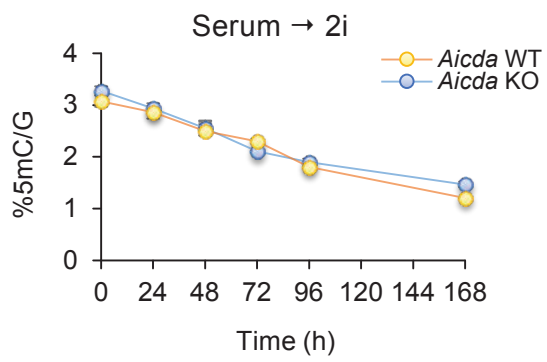

B

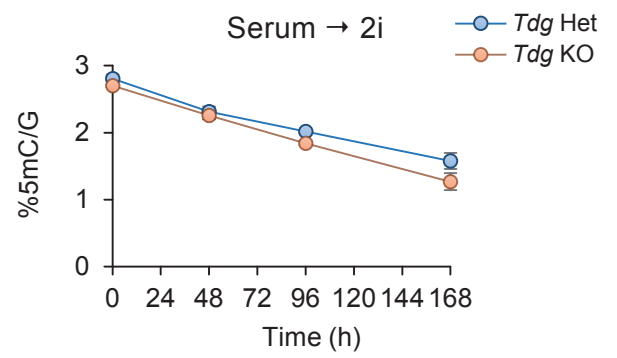

Figure S3

A

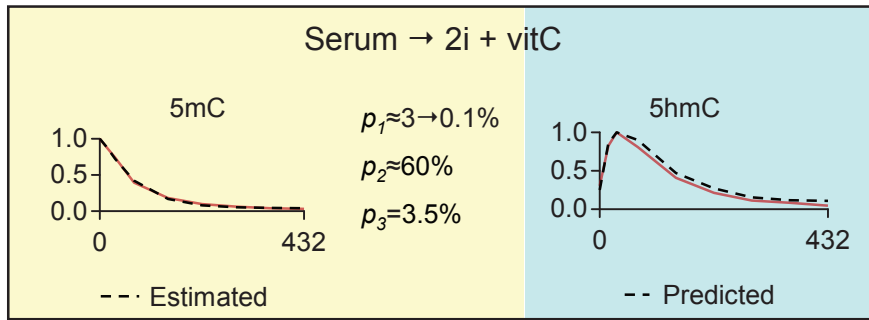

B

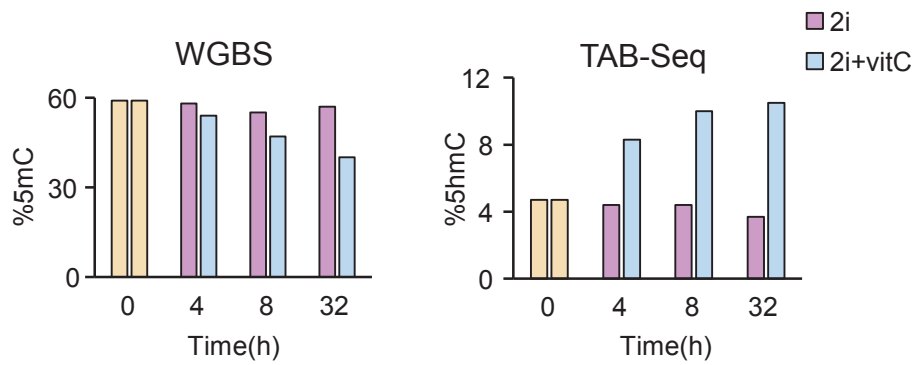

C

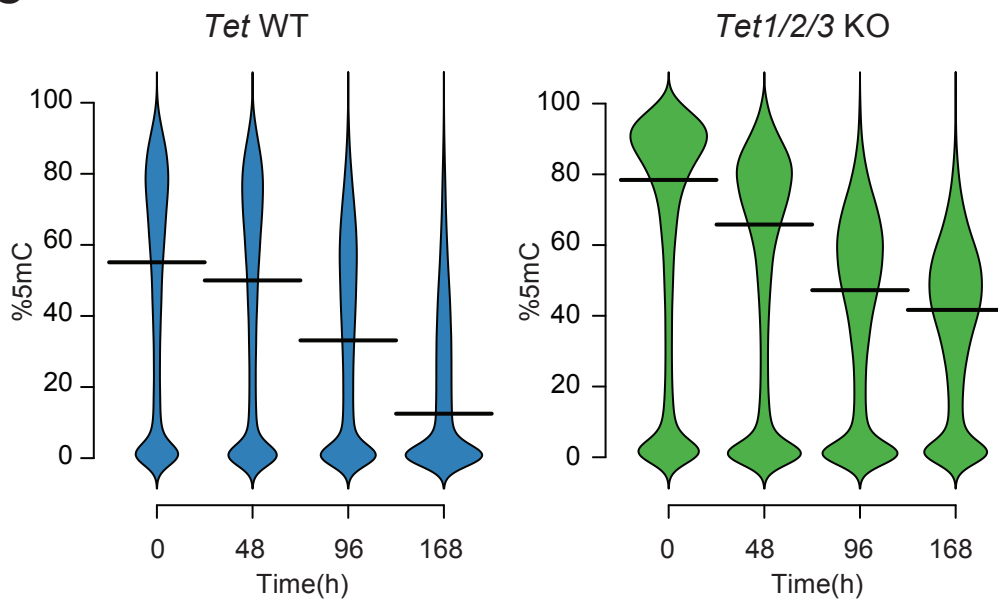

D

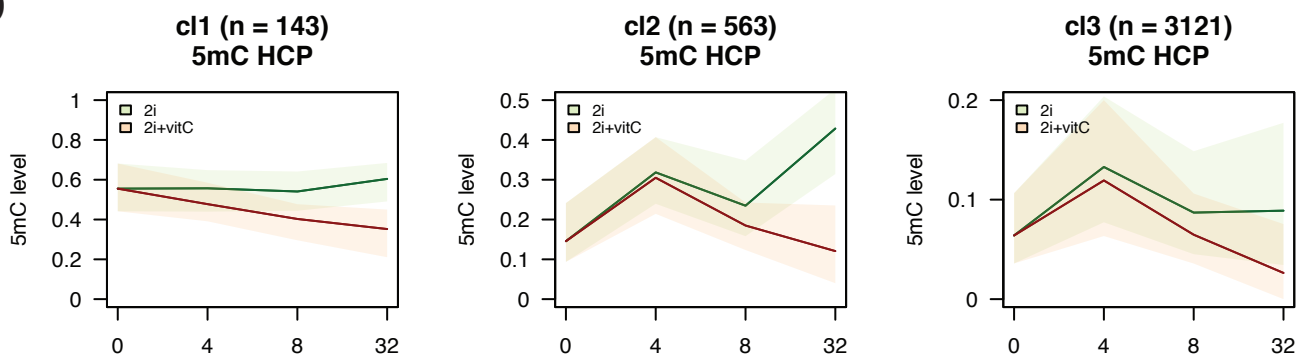

Figure S4

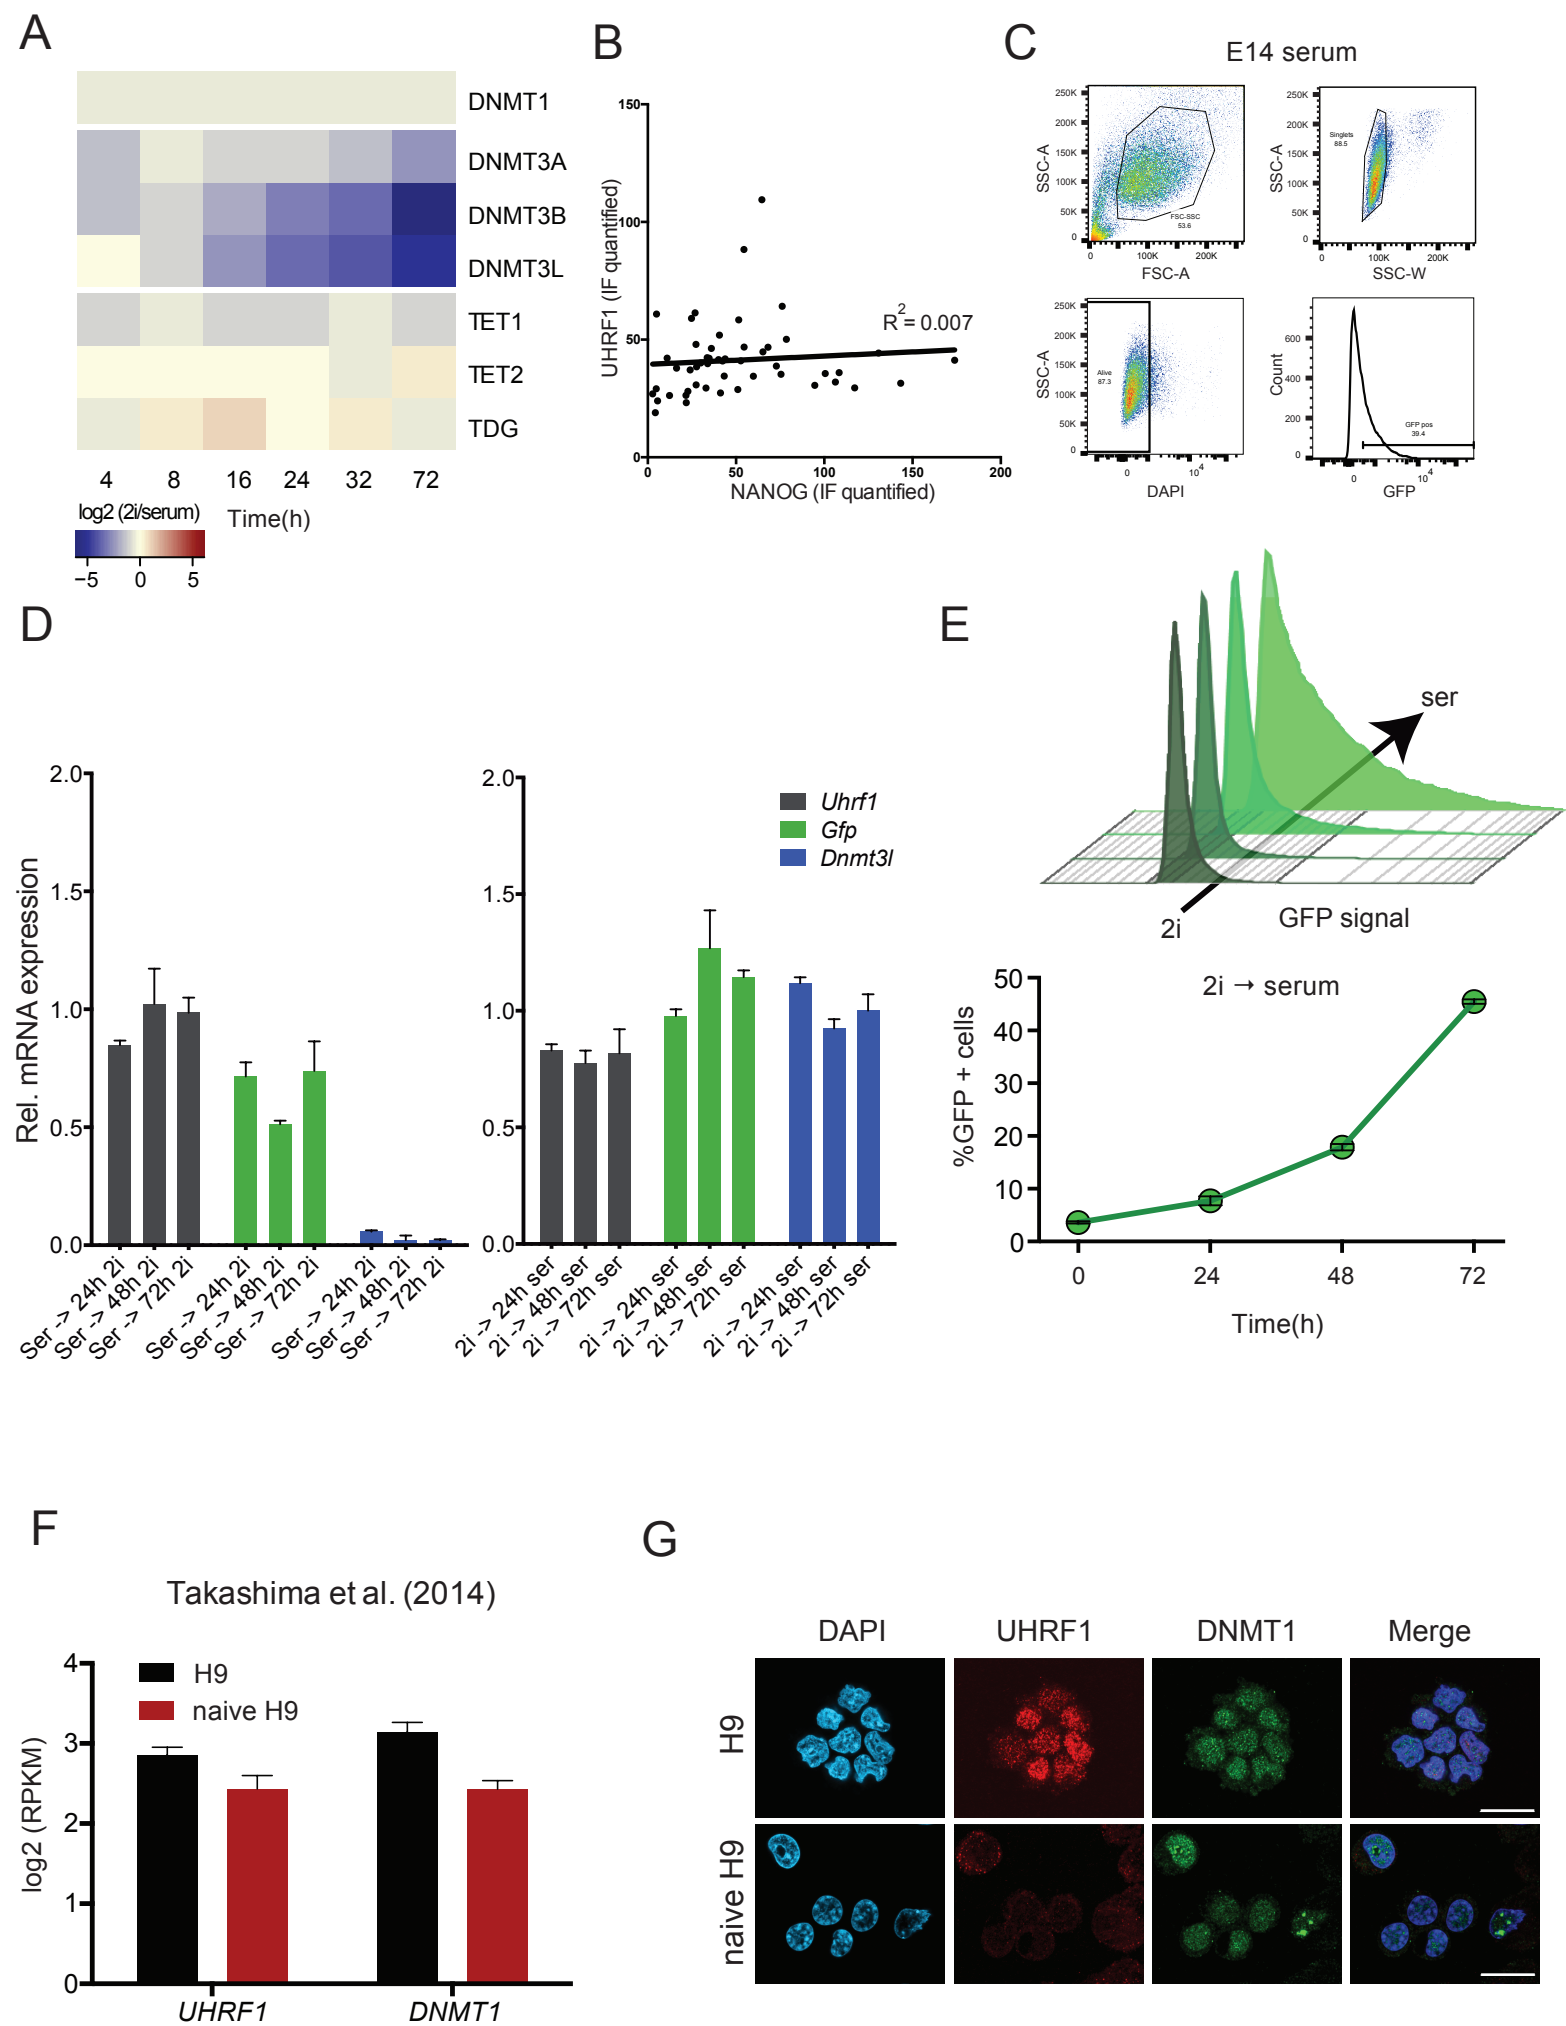

Figure S5

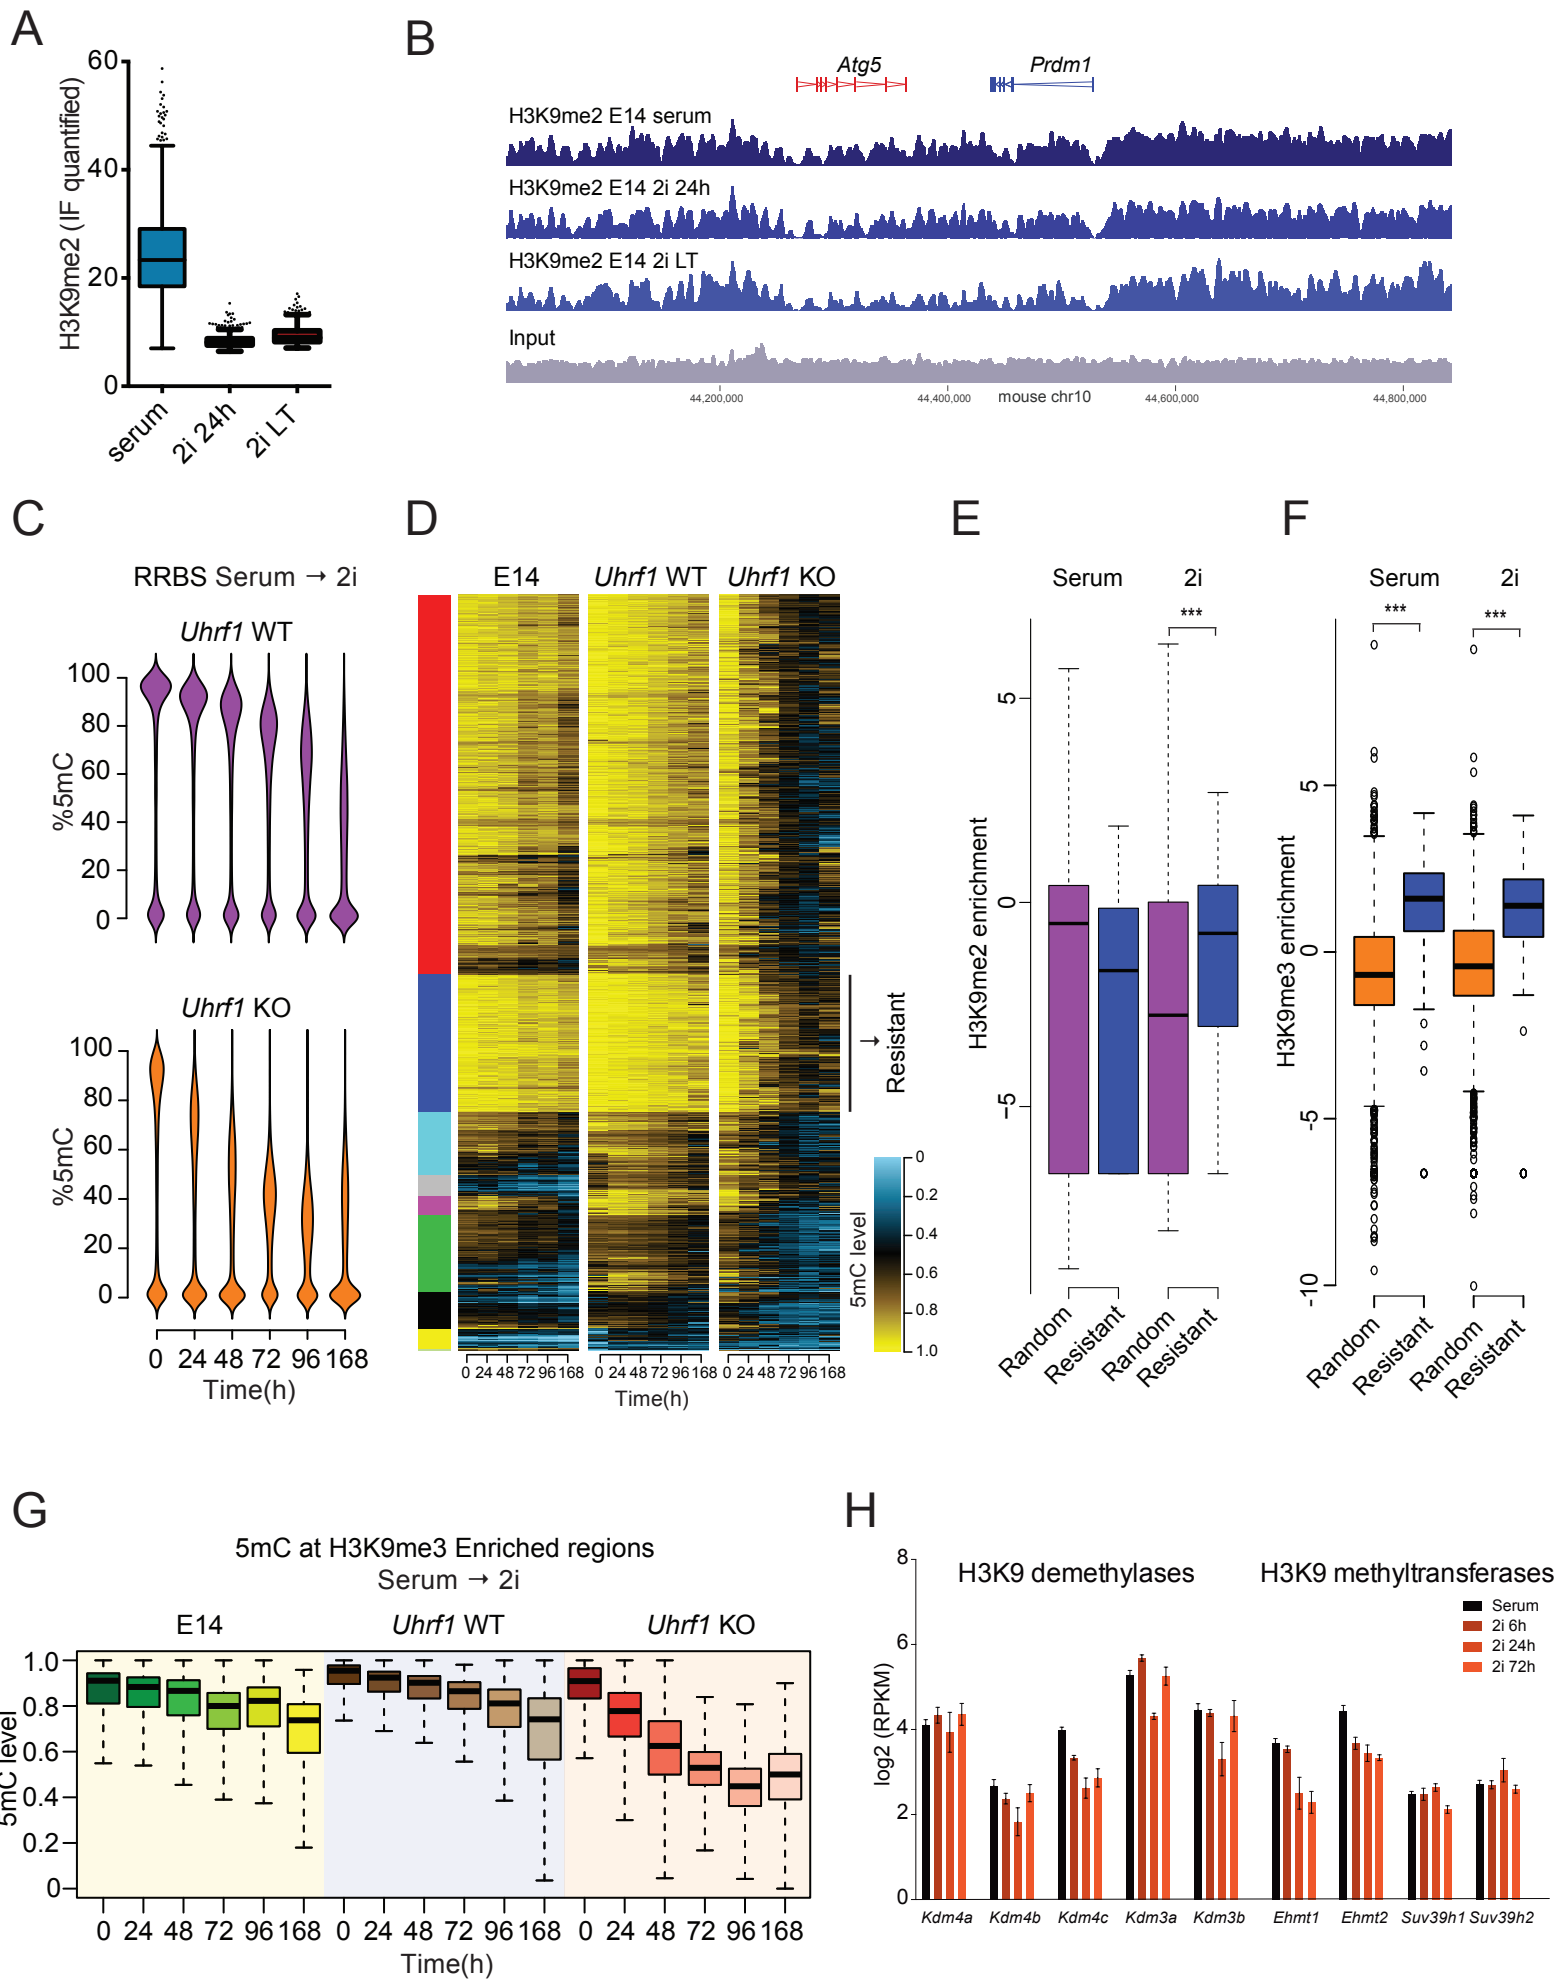

Figure S6

2nd Solution of PGC modelling  
"TET-dependent demethylation"

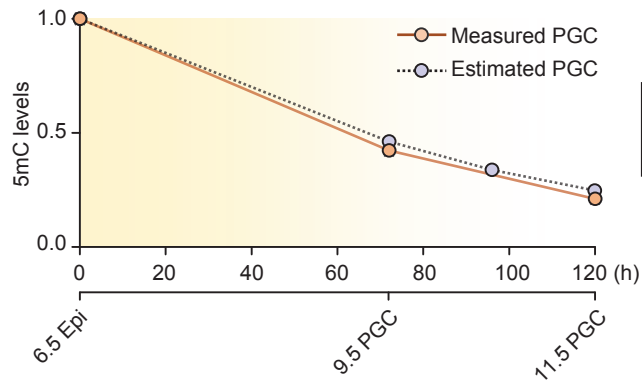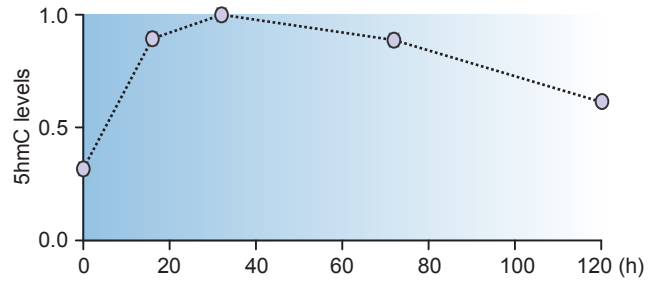

# Table S1, Related to Figure 1 and S1:

List of initial values and parameters employed in the mathematical modeling

| Input                               |                            |                |                             |
|-------------------------------------|----------------------------|----------------|-----------------------------|
| Dyads                               | Symbol                     | initial values | Value determination methods |
| CpG/GpC                             | $X_1$                      | 177038         | Hairpin BS-seq              |
| <sup>m</sup> CpG/GpC                | $X_2$                      | 176187         | Hairpin BS-seq              |
| <sup>m</sup> CpG/GpC <sub>m</sub>   | $X_3$                      | 553158         | Hairpin BS-seq              |
| <sup>hm</sup> CpG/GpC <sub>m</sub>  | $X_4$                      | 55783          | Hairpin BS-seq and TAB-seq  |
| <sup>hm</sup> CpG/GpC <sub>hm</sub> | $X_5$                      | 14991          | Hairpin BS-seq and TAB-seq  |
| <sup>hm</sup> CpG/GpC               | $X_6$                      | 8894           | Hairpin BS-seq and TAB-seq  |
|                                     |                            |                |                             |
| Parameters                          | Function                   |                |                             |
| $p_1$                               | <i>De novo</i> methylation |                |                             |
| $p_2$                               | Maintenance methylation    |                |                             |
| $p_3$                               | hydroxymethylation         |                |                             |
| $d$                                 | Cell division rate         |                |                             |

## SUPPLEMENTAL FIGURE LEGENDS

### Figure S1. Dynamic regulation of 5mC and 5hmC during serum-to-2i conversion of mESCs, Related to Figure 1 and Table S1

- (A) Expression level of *Aicda* and *Tdg* during the serum-to-2i transition. Error bars indicate mean  $\pm$  SD from three biological replicates.
- (B) Percentage of 5mC as measured by WGBS in E14 ESCs during serum-to-2i conversion.
- (C) Percentage of 5hmC as measured by TAB-Seq in E14 ESCs during serum-to-2i conversion.
- (D) Distribution of methylation levels in CpG dyads, measured by Hairpin-BS-Seq, in serum and 2i ESCs
- (E) Dynamic changes of DNMT3A/B proteins, as predicted by the mathematical modeling (changes in  $p_1$ ) and corresponding real protein levels, determined by protein mass spectrometry (compare Figure S4A).

### Figure S2. Global demethylation kinetics in mutants of the DNA methylation machinery, Related to Figure 2

- (A) Levels of 5mC in *Aicda* KO and controls ESCs (*Aicda* WT) during the serum-to-2i transition, measured by mass spectrometry. Error bars indicate mean  $\pm$  SD from three biological replicates.
- (B) Levels of 5mC in *Tdg* KO and controls ESCs (*Tdg* Het) during the serum-to-2i transition, measured by mass spectrometry. Error bars indicate mean  $\pm$  SD from three biological replicates.

### Figure S3. Global demethylation kinetics in mutants of the TET proteins, Related to Figure 3 and Table S2

- (A) Mathematical modeling of 5mC and 5hmC dynamics during the serum-to-2i transition in the presence of vitC. The estimated value for active demethylation  $p_3$  was estimated using measured 5mC values only. The overlay between the mathematical model prediction (dotted line) and the normalized measured (red line) 5mC and 5hmC data is shown with  $p_3=3.5\%$ .
- (B) Global changes in absolute 5mC and 5hmC levels during the first 32h of reprogramming from serum (wheat) to 2i (purple) or 2i+vitC (light blue) measured by WGBS (left panel) and TAB-seq (right panel), respectively.
- (C) Bean-plot showing methylation data from RRBS-seq in *Tet* WT and *Tet1/2/3* KO datasets during the serum-to-2i transition. Horizontal bars represent the median values.
- (D) 5mC levels at HCPs, subdivided into three main clusters. Shown is the overall trend and the boundaries of the shaded area in each plot indicate the 25th percentiles and the 75th percentiles of each cluster in E14 ESCs with and without vitC.

### Figure S4. Uhrf1 is regulated at the protein level also in human ESCs, Related to Figure 4

- (A) Relative protein levels of DNMTs and TETs determined by protein mass spectrometry signal (label-free quantification (LFQ)) at different time points during serum-to-2i conversion.
- (B) Correlation of the quantified signals of UHRF1 and NANOG in immunofluorescence staining of serum ESCs. The black line represents the linear regression between UHRF1 and NANOG signals in serum ESCs.
- (C) FACS gating strategy used to quantify GFP positive cells in the UHRF1-GFP fusion protein ESC line. Shown is one representative sample grown in primed serum ESC conditions.
- (D) mRNA levels of *Uhrf1*, *Gfp* and *Dnmt3l* from UHRF1-GFP fusion protein ESC line during the serum-to-2i transition and the 2i-to-serum transition. Error bars indicate mean  $\pm$  SD from three biological replicates.
- (E) FACS analysis of UHRF1-GFP fusion protein in ESCs during 2i-to-serum conversion. Histograms show the GFP signal intensity at different time points during the conversion. The black arrow depicts the threshold used to quantify the percentage of GFP+ cells, shown in the line graph. Error bars indicate mean  $\pm$  SD from three biological replicates.
- (F) Graph shows the quantification of GFP+ cells at each time-point. Error bars indicate mean  $\pm$  SD from three biological replicates.
- (G) Expression levels of *UHRF1* and *DNMT1* in conventional and naive human ESCs. RPKM values from (Takashima et al., 2014). Error bars indicate mean  $\pm$  SD.
- (H) Immunofluorescence staining of DAPI (blue), UHRF1 (red) and DNMT1 (green) in conventional and naive human ESCs. Scale bar represents 20 $\mu$ m.



**Figure S5. UHRF1 and H3K9me2 are necessary to maintain methylation at specific loci, Related to Figure 5**

- (A) Semi-quantification of H3K9me2 immunofluorescence staining in serum, 24h 2i and LT 2i ESCs. The y-axis corresponds to arbitrary units of mean values of pixel intensity.
- (B) ChIP-Seq track for H3K9me2 at the *Prdm1* locus (50 kb) from serum, 24h 2i and LT 2i ESCs.
- (C) Bean-plot showing methylation data from RRBS-Seq in *Uhrfl* WT and *Uhrfl* KO datasets during the serum-to-2i transition.
- (D) Heatmap showing methylation levels of the genomic features that display highest degree of resistance to demethylation in *Uhrfl* KO ESCs. Blue cluster highlights a group of regions resistant to demethylation in cells with UHRF1.
- (E) Enrichment of H3K9me2 and (F) H3K9me3 over regions identified to resist DNA demethylation during the serum-to-2i transition (blue cluster from (D)).
- (G) Levels of 5mC, determined by RRBS at H3K9me3 enriched regions (from (Marks et al., 2012)) during the serum-to-2i transition in E14, *Uhrfl* WT and *Uhrfl* KO ESCs.
- (H) Expression levels of known H3K9 modifiers. Error bars indicate mean  $\pm$  SD from three biological replicates.

Student's t test was performed for the indicated comparisons. \*\*\* $p < 0.001$

**Figure S6. Mathematical modeling of PGCs, Related to Figure 6**

Summary of the 2<sup>nd</sup> solution of the mathematical modeling of migratory PGC demethylation. The first column shows measured (solid lines) and estimated (dotted lines) global levels of 5mC (values have been scaled) in migratory PGCs. The second column summarizes the estimated activities of the three pathways. The third column shows the predicted (dotted lines) global 5hmC values (scaled).

**SUPPLEMENTAL TABLE LEGENDS**

**Table S1, Related to Figure 1 and S1:** List of initial values and parameters employed in the mathematical modeling.

**Table S2, Related to Figure 3 and S3:** List of 500bp regions higher methylated in *Tet1/2/3* KO cells compared to *Tet* WT cells. Reads were mapped to the mouse NCBIM37 genome build using Bismark and average CpG methylations were calculated over each 500bp region in Seqmonk.

## SUPPLEMENTAL EXPERIMENTAL PROCEDURES

### Cell Culture

All mouse ESC lines including E14 (129/Ola), J1 (129S4/SvJae), *Tdg<sup>-/-</sup>* (129/C57BL6) (Cortázar et al., 2011), *Aicda<sup>-/-</sup>* (C57BL6), *Tet<sup>[1<sup>-/-</sup>,2<sup>-/-</sup>,3<sup>-/-</sup>]</sup>* (C57BL6/129/FVB) (Hu et al., 2014), and their control lines were cultured without feeders in the presence of LIF in DMEM containing 15% fetal calf serum. *Dnmt1<sup>fl/fl</sup>* (C57BL6), *Uhrf1<sup>fl/fl</sup>* (C57BL6) (Sharif et al., 2016), *Dnmt[3a<sup>fl/fl</sup>, 3b<sup>fl/fl</sup>]* (129/Ola/C57BL6), *Tet<sup>[1<sup>-/-</sup>,2<sup>-/-</sup>]</sup>* (129/C57BL6) (Dawlaty et al., 2013), and their control lines were expanded on feeder and purified from feeders by sequential pre-plating. Tamoxifen inducible Cre recombinase was used to induce recombination of loxP sites in the floxed cell lines. Tamoxifen (Sigma) was added directly to the media 48 hours prior to the experiment. For serum-to-2i transition, serum medium was replaced by serum-free N2B27 (N2 & B27; Gibco) or NDiff227 (StemCells, Inc.) supplemented with LIF, MEK inhibitor PD0325901 (1  $\mu$ M) and GSK3 inhibitor CHIR99021 (3  $\mu$ M), together known as 2i (Ying et al., 2008). For serum-to-2i switching in the presence of vitamin C (L-ascorbic acid, Sigma), 17  $\mu$ M of vitamin C (dissolved in water) was added to 2i. The media were refreshed every day and cells were passaged every 2-3 days. Primed human ESCs H9 (WiCell Research Institute) (Thomson et al., 1998) were maintained as previously described (E8 media, StemCells, Inc.) on vitronectin; naive human ESCs (H9) were obtained from Austin Smith and maintained in defined naive growth conditions (Takashima et al., 2014) on feeders.

### Generation of *Dnmt[3a<sup>fl/fl</sup>, 3b<sup>fl/fl</sup>]* lines

*Dnmt[3a<sup>fl/fl</sup>, 3b<sup>fl/fl</sup>]* cell lines were derived as previously reported (Nesterova et al., 2008) from XY embryos homozygous for conditional mutations of *Dnmt3a* and *Dnmt3b* genes (Dodge et al., 2005; Kaneda et al., 2004) and heterozygous for tamoxifen-inducible Cre-recombinase targeted into the Rosa26 locus (Vooijs et al., 2001). Eight-cell embryos were flushed from oviducts and incubated in M16 medium (Sigma-Aldrich) supplemented with PDO325901 (1 $\mu$ M, Miltenyi Biotec Ltd) and CHIR99021 (3 $\mu$ M, Miltenyi Biotec Ltd) for 24 - 48 hours. After further 24 hours of incubation in NDiff227 medium (StemCells, Inc.) supplemented with 2i and LIF, hatched blastocysts were moved individually into wells of 4-well plates and allowed to grow for 4 to 7 days until ESC-like outgrowths could be seen. Dissected and trypsinised outgrowths were seeded on 4-well plates and cell lines were expanded and genotyped by PCR.

### WGBS, RRBS, TAB-seq and Hairpin-Bisulfite Sequencing

DNA was isolated using the Cell Culture DNA Midi Kit from QIAGEN (Cat No 13343), GenElute™ Mammalian Genomic DNA Miniprep Kit (Cat No G1N350, Sigma), or Beckman Coulter's Agencourt RNAdvance Cell v2 kit. WGBS, RRBS and TAB-Seq was performed as described previously (Lister et al., 2008; Smallwood et al., 2011; Yu et al., 2012). We performed paired-end DNA sequencing (2\*100 nucleotides) using the Illumina Hi-Seq 2000 for WGBS, and single-end DNA sequencing (50 nucleotides) using the Illumina Hi-Seq 2000 for RRBS. Whole genome hairpin bisulfite sequencing was performed as described (Zhao et al., 2014) and sequencing was performed on Illumina MiSeq.

### ChIP-Seq and ChIP-BS-Seq

For chromatin immunoprecipitation, cells were cross-linked with 1% methanol-free formaldehyde in fresh medium for 10 minutes. Cross-linking reaction was quenched with glycine at a final concentration of 0.2M. Cells were washed twice with ice-cold PBS and harvested. Cell pellets were resuspended in LB1 buffer (50 mM Hepes-KOH, pH 7.5; 140 mM NaCl; 1 mM EDTA; 10% Glycerol; 0.5% NP-40 or Igepal CA-630; 0.25% Triton X-100, protease inhibitors) for 10 minutes at 4°C, pelleted and resuspended in LB2 buffer (10 mM Tris-HCl, pH8.0; 200 mM NaCl; 1 mM EDTA; 0.5 mM EGTA, protease inhibitors) for 10 minutes at 4°C. Cells were pelleted, resuspended in LB3 buffer (10 mM Tris-HCl, pH 8; 100 mM NaCl; 1 mM EDTA; 0.5 mM EGTA; 0.1% Na-Deoxycholate; 0.5% N-lauroylsarcosine, protease inhibitors) and sonicated using Misonix Sonicator 3000. After addition of Triton-X to a final concentration of 1%, the lysate was centrifuged at 20,000g for 10 minutes to pellet debris. Sonicated chromatin was added to the bead-antibody complexes and incubated overnight at 4°C. Bead-antibody were prepared as follows: Protein G-coupled Dynabeads were incubated overnight with primary antibodies (anti-H3K9me2; Abcam ab1220) in PBS added with 5 mg/ml BSA. Beads were washed extensively with RIPA buffer (50mM HEPES pH 7.6, 1mM EDTA, 0.7% Na-Deoxycholate, 1% NP-40, 0.5M LiCl), once with 1x TE buffer and eluted in 200ul of buffer containing 1% SDS and 0.1M NaHCO<sub>3</sub>. Cross-linking was reversed by incubation at 65°C overnight, followed by RNase A treatment at 37°C for 1 hour and Proteinase K treatment at 55°C for 2 hours. DNA was then extracted using Beckman Coulter's Agencourt RNAdvance Cell v2 kit following the manufacture's

instructions. Eluted DNA was then used for ChIP-Seq library preparation using the MicroPlex Library Preparation Kit v2 (Diagenode) or alternatively treated as WGBS samples as described above.

### Proteomics

Total proteins for each sample were isolated and tryptic digested following a published label-free proteomics protocol (Liu et al., 2012). Protein identification and quantification were performed using MaxQuant software (version 1.3.5.7) with standard settings (Cox and Mann, 2008) and search against the UniProtKB/Swiss-Prot human database (generated from version 06-2012).

### RNA-Seq and Reverse Transcription Quantitative Real-Time PCR

Total RNA for each sample was extracted using Beckman Coulter's Agencourt RNAdvance Cell v2 kit following the manufacturer's instructions. Extracted RNA was PolyA-enriched and used for library preparation using the TruSeq RNA Library Prep Kit v2 (Illumina) following the manufacturer's instructions. Libraries were indexed using Illumina Indexes and 50 bp single-end sequencing was performed on Illumina HiSeq 2000 instruments using TruSeq reagents (Illumina, San Diego, CA, USA), according to manufacturer's instructions. Quantitative PCR experiments were performed following standard protocols. Complementary DNA (cDNA) was prepared from DNase treated total RNA using SuperScript III (Invitrogen) and oligo-dT primers. At least two independent samples were assayed for all quantitative PCR reactions. Endogenous controls (*Atp5b*, *Hspcb*) were used to normalize expression. Primers are listed below.

| Gene          | Primer        | Sequence                 |
|---------------|---------------|--------------------------|
| <i>Uhrfl</i>  | msRT_UHRF1_F  | GCTCCAGTGCCGTTAAGACC     |
|               | msRT_UHRF1_R  | CACGAGCACGGACATTCTTG     |
| <i>Gfp</i>    | RT_eGFP_F     | CAACAGCCACAACGTCTATATCAT |
|               | RT_eGFP_R     | ATGTTGTGGCGGATCTTGAAG    |
| <i>Hspcb</i>  | msRT_Hspcb_F  | GCTGGCTGAGGACAAGGAGA     |
|               | msRT_Hspcb_R  | CGTCGGTTAGTGGAACTTTCATG  |
| <i>Atp5b</i>  | msRT_Atp5b_F  | GGCCAAGATGTCTCTGCTGTT    |
|               | msRT_Atp5b_R  | GCTGGTAGCCTACAGCAGAAGG   |
| <i>Dnmt3l</i> | msRT_DNMT3L_F | ATGGACAATCTGCTGCTGACTG   |
|               | msRT_DNMT3L_R | CGCATAGCATTCTGGTAGTCTCTG |

### Analysis of nucleoside mass spectrometry

Nucleosides levels were quantified by integrating peak areas for the fragment ions from extracted mass spectrometry ion chromatograms of the relevant scans and calibrated relative to external standards obtained by digestion of nucleotide triphosphates.

### Fluorescence-activated cell sorting (FACS)

A stable mouse ESC line, overexpressing UHRF1 fused to GFP, was generated. Stable integration of the exogenous DNA was selected for with blasticidin, which is expressed from the same promoter as *Uhrfl-Gfp* using an internal ribosome entry site (IRES) connecting the two cDNAs. UHRF1-GFP cells were grown under serum or 2i conditions. Media was switched to 2i or serum, respectively, and cells were cultured for the indicated time periods. Cells were then dissociated into single cells and analyzed on a LSR Fortessa Cell Analyzer (BD). Cells were gated for singlets and living cells were identified using the level of DAPI incorporation and the level of GFP signal was recorded for each cell. The expression of GFP in long-term 2i conditions was set as negative background and the percentage of cells with higher GFP signal in each condition was plotted.

### Immunofluorescence and Imaging

Antibody staining was performed as previously described (Santos et al., 2003) on ESCs grown on coverslips or cytopun, after fixation with 2% PFA for 30 minutes at room temperature. Briefly, cells were permeabilised with 0.5% TritonX-100 in PBS for 1h; blocked with 1% BSA in 0.05% Tween20 in PBS (BS) for 1h; incubation of the appropriate primary antibody diluted in BS; followed by wash in BS and secondary antibody. For simultaneous detection with DNA methylation, after first round of antibody staining, samples were washed in PBS, post-fixed in 2% PFA for 10 minutes, treated with 2N HCl for 30 minutes at 37°C and washed extensively with PBS before incubating with anti-5mC, diluted in BS. All secondary antibodies were Alexa Fluor conjugated (Molecular Probes) diluted 1:1000 in BS and incubated for 30 minutes. Incubations were performed at room temperature unless otherwise

stated. Staining of replication foci was performed by adding 10 $\mu$ M EdU for 8 minutes to the culture medium prior to fixation and visualized with a Click-iT EdU Imaging kit (Molecular Probes). DNA was counterstained with 5 $\mu$ g/mL DAPI in PBS. Single optical sections were captured with a Zeiss LSM780 microscope (63x oil-immersion objective) and the images pseudo-colored using Adobe Photoshop. For visualization, images were corrected for brightness and contrast, within the recommendations for scientific data. Single cell RGB profiles were plotted with ImageJ 1.44p (NIH) after removing the background around the cells. Fluorescence semi-quantification analyses were performed with Volocity 6.3 (Improvision). Antibodies used are listed below.

| Antibody             | Cat.no.      | Company    | Dilution |
|----------------------|--------------|------------|----------|
| Anti-mUHRF1 (Th-10a) | D289-3       | MBL        | 1:250    |
| Anti-hUHRF1 (H-8)    | sc-373750    | Santa Cruz | 1:100    |
| Anti-DNMT1           | ab87654      | Abcam      | 1:1000   |
| Anti-H3K9me2         | ab1220       | Abcam      | 1:200    |
| Anti-5mC             | BI-MECY-0100 | Eurogentec | 1:500    |
| Anti-NANOG           | ab80892      | Abcam      | 1:500    |

### Western blot analysis

Whole cell protein extracts were prepared using 1xRIPA buffer (Thermo Scientific, 89900) with protease and phosphatase inhibitors (Fisher Scientific, PN87786 and PN78420). 10  $\mu$ g of proteins were resolved by SDS-PAGE and transferred on nitrocellulose membranes. Membranes were blocked in PBS-0.1%Tween (PBST) containing 5% BSA (blocking buffer) overnight at 4°C. Primary antibody incubation was done at room temperature for 2 hours, followed by two washes with PBST and incubated with HRP conjugated secondary antibodies (1:6000) in blocking buffer. HRP conjugates were detected with enhanced chemiluminescence (ECL, Amersham Biosciences). Antibodies used are listed below.

| Antibody             | Cat.no.  | Company    | Dilution |
|----------------------|----------|------------|----------|
| Anti-mUHRF1 (Th-10a) | sc-98817 | Santa Cruz | 1:1000   |
| Anti-H3K9me2         | 07-212   | Millipore  | 1:1000   |
| Anti-HSP90 (H-114)   | sc-7947  | Santa Cruz | 1:1000   |

### Bioinformatics

Raw sequence reads were trimmed to remove poor quality reads, adapter contamination, and the first 6 base pairs, using Trim Galore ([http://www.bioinformatics.babraham.ac.uk/projects/trim\\_galore/](http://www.bioinformatics.babraham.ac.uk/projects/trim_galore/)).

For RRBS, WGBS, TAB-Seq, and ChIP-BS-Seq, the remaining sequences were mapped to the mouse reference genome NCBIM37 using Bismark (Krueger and Andrews, 2011) or rmapbs-pe (Song et al., 2013). CpG methylation calls were extracted and analyzed using SeqMonk ([www.bioinformatics.babraham.ac.uk/projects/seqmonk/](http://www.bioinformatics.babraham.ac.uk/projects/seqmonk/)) and/or custom R scripts. For TAB-Seq, hmC protection/non-protection and mC non-conversion rates were quantified and estimated levels were corrected as described in detail previously (Lister et al., 2013; Yu et al., 2012). A maximum likelihood method (Qu et al., 2013) on the combined data from WGBS and TAB-Seq were used to estimate absolute levels for 5mC and 5hmC.

For RNA-Seq data analysis, trimmed sequencing reads were aligned to mouse genome assembly GRCm38 using TopHat. SeqMonk, and custom R scripts were used to normalize the data and perform pair-wise comparisons of genes at each time point.

For ChIP-Seq data analysis, trimmed sequencing reads were aligned to mouse genome assembly NCBIM37 using Bowtie2 and analyzed using SeqMonk and/or custom R scripts.

### Mathematical modeling

The structure (equations) of the model was adapted from (McGovern et al., 2012). Equations were solved numerically using the Runge-Kutta 4<sup>th</sup> order method. We implemented the code in Perl and parallelized using the Many-Core Engine (MCE) Perl module (<https://code.google.com/p/many-core-engine-perl/>).

As input values, the percentages of unmethylated CpG dyads (CpG/GpC;  $x_1$ ), hemi-methylated CpG dyads (mCpG/GpC;  $x_2$ ) and fully methylated CpG dyads (mCpG/GpCm;  $x_3$ ) were extracted directly from WGBS and hairpin BS-Seq. Total percentage of hmCpG was directly calculated from TAB-seq data. Due to the lack of hairpin TAB-seq data, we estimated hemi-hydroxymethylated CpG (hmCpG/GpC;  $x_4$ ), hemi-methylated hemi-hydroxymethylated CpG dyads (mCpG/GpCm;  $x_5$ ) and

fully hydroxymethylated CpG (hmCpG/GpChm,  $x_6$ ), by considering the fraction of methylated/hemimethylated CpG compared to total mCpG dyads and the proportion of total mCpG to the total hmCpG dyads.

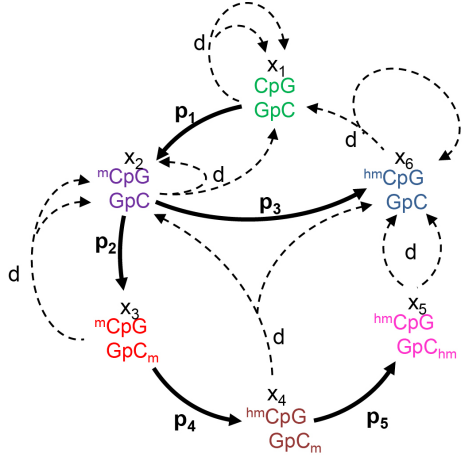

$$\begin{aligned}\frac{\partial x_1}{\partial t} &= (d - l - p_1)x_1 + dx_2 + dx_6 \\ \frac{\partial x_2}{\partial t} &= p_1x_1 - (l + p_2 + p_3)x_2 + 2dx_3 + dx_4 \\ \frac{\partial x_3}{\partial t} &= p_2x_2 - (d + l + p_4)x_3 \\ \frac{\partial x_4}{\partial t} &= p_4x_3 - (d + l + p_5)x_4 \\ \frac{\partial x_5}{\partial t} &= p_5x_4 - (d + l)x_5 \\ \frac{\partial x_6}{\partial t} &= p_3x_2 + dx_4 + 2dx_5 - lx_6\end{aligned}$$

Four types of parameters have been defined in the model:

$p_1$ : proportionality constant for *de novo* methylation

$p_2$ : proportionality constant for maintenance methylation

$p_{3-5}$ : proportionality constants for hydroxymethylation ( $p_3=p_4/2=p_5$ )

\*\*Although in theory,  $p_4$  seems to be twice of  $p_3$  or  $p_5$ , our simulations with different combinations of parameters shows that for the best fits these values adopt almost similar values. Therefore, during our simulations we assumed  $p_3=p_4=p_5$ .

$d$ : cell division rate (population growth rate) is the number of doublings that occur per unit of time and is calculated as follow:

$$T_d = \frac{\log(2)}{\log(1+d)} \approx \frac{0.7}{d} \Rightarrow d \approx 0.7 / T_d \quad T_d = \text{doubling time}$$

For serum and 2i, the doubling time was set to 13 and 16, respectively. Adaptation of cell cycle (doubling time) during serum to 2i transition occurs quite fast (after ~8h; unpublished data), therefore we set doubling time/growth rate before and after 8h as serum and 2i, respectively.

To estimate the parameters, a hypothetical parameter space ( $\theta_p$ ) was defined encompassing every combination of the following setting:  $\theta_{p_1}$  and  $\theta_p$  oscillating in the range of  $0 \leq \theta_{p_{1,3-5}} \leq 1$  with step-size 0.00125. To reduce the dimensionality, we restricted  $\theta_{p_2}$  to vary in the range of  $0 \leq \theta_{p_2} \leq 1$  with step-size of 0.05. We implemented dynamic changing instead of single, non-variable  $p_1$ - $p_5$  constants to mimic the anticipated gradual change in protein abundance and/or enzymatic activity throughout the interconversion. We divided the time-course into non-overlapping time segments from 0-4h, 4-8h, 8-16h, 16-24h, 24-32h, 32-72h, 72-144h, 144-432h. Consequently, whenever a number from the parameter space is assigned to the initial  $p_1$ - $p_5$  values, these values are dynamically changed in each subsequent time interval to reflect the predicted fold change in protein abundances.

The simulations were performed with all combinations of the parameter spaces ( $\theta_p$  and  $f_k$ ) and for each set of parameters, the percentages of dyads (the level of 5mC as well as 5hmC) was generated for every point throughout the time course. Then, using the least square optimization we compared measured data to all simulated data.

The least squares method finds its optimum when the sum,  $S$ , of squared residuals

$$S = \sum_{i=1}^n (\text{measured}_i - \text{predicted}_i)^2$$

is a minimum. A residual is defined as the difference between the actual value of the dependent variable and the value predicted by the model.

Simulated profiles with the least minimum error values were selected and the median of their related parameters were considered as the optimal parameters for further predictions.

## References

- Cortázar, D., Kunz, C., Selfridge, J., Lettieri, T., Saito, Y., MacDougall, E., Wirz, A., Schuermann, D., Jacobs, A.L., Siegrist, F., et al. (2011). Embryonic lethal phenotype reveals a function of TDG in maintaining epigenetic stability. *Nature* *470*, 419–423.
- Cox, J., and Mann, M. (2008). MaxQuant enables high peptide identification rates, individualized p.p.b.-range mass accuracies and proteome-wide protein quantification. *Nat Biotechnol* *26*, 1367–1372.
- Dawlaty, M.M., Breiling, A., Le, T., Raddatz, G., Barrasa, M.I., Cheng, A.W., Gao, Q., Powell, B.E., Li, Z., Xu, M., et al. (2013). Combined Deficiency of Tet1 and Tet2 Causes Epigenetic Abnormalities but Is Compatible with Postnatal Development. *Dev Cell* *24*, 310–323.
- Dodge, J.E., Okano, M., Dick, F., Tsujimoto, N., Chen, T., Wang, S., Ueda, Y., Dyson, N., and Li, E. (2005). Inactivation of Dnmt3b in mouse embryonic fibroblasts results in DNA hypomethylation, chromosomal instability, and spontaneous immortalization. *J Biol Chem* *280*, 17986–17991.
- Hu, X., Zhang, L., Mao, S.-Q., Li, Z., Chen, J., Zhang, R.-R., Wu, H.-P., Gao, J., Guo, F., Liu, W., et al. (2014). Tet and TDG mediate DNA demethylation essential for mesenchymal-to-epithelial transition in somatic cell reprogramming. *Cell Stem Cell* *14*, 512–522.
- Kaneda, M., Okano, M., Hata, K., Sado, T., Tsujimoto, N., Li, E., and Sasaki, H. (2004). Essential role for de novo DNA methyltransferase Dnmt3a in paternal and maternal imprinting. *Nature* *429*, 900–903.
- Krueger, F., and Andrews, S.R. (2011). Bismark: a flexible aligner and methylation caller for Bisulfite-Seq applications. *Bioinformatics* *27*, 1571–1572.
- Lister, R., Mukamel, E.A., Nery, J.R., Urich, M., Puddifoot, C.A., Johnson, N.D., Lucero, J., Huang, Y., Dwork, A.J., Schultz, M.D., et al. (2013). Global epigenomic reconfiguration during mammalian brain development. *Science* *341*, 1237905–1237905.
- Lister, R., O'Malley, R.C., Tonti-Filippini, J., Gregory, B.D., Berry, C.C., Millar, A.H., and Ecker, J.R. (2008). Highly integrated single-base resolution maps of the epigenome in Arabidopsis. *Cell* *133*, 523–536.
- Liu, N.Q., Braakman, R.B.H., Stingl, C., Luider, T.M., Martens, J.W.M., Foekens, J.A., and Umar, A. (2012). Proteomics pipeline for biomarker discovery of laser capture microdissected breast cancer tissue. *J Mammary Gland Biol Neoplasia* *17*, 155–164.
- Marks, H., Kalkan, T., Menafra, R., Denissov, S., Jones, K., Hofemeister, H., Nichols, J., Kranz, A., Stewart, A.F., Smith, A., et al. (2012). The transcriptional and epigenomic foundations of ground state pluripotency. *Cell* *149*, 590–604.
- McGovern, A.P., Powell, B.E., and Chevassut, T.J.T. (2012). A dynamic multi-compartmental model of DNA methylation with demonstrable predictive value in hematological malignancies. *J. Theor. Biol.* *310*, 14–20.
- Nesterova, T.B., Popova, B.C., Cobb, B.S., Norton, S., Senner, C.E., Tang, Y.A., Spruce, T., Rodriguez, T.A., Sado, T., Merkenschlager, M., et al. (2008). Dicer regulates Xist promoter methylation in ES cells indirectly through transcriptional control of Dnmt3a. *Epigenetics Chromatin* *1*, 2.
- Qu, J., Zhou, M., Song, Q., Hong, E.E., and Smith, A.D. (2013). MLML: consistent simultaneous estimates of DNA methylation and hydroxymethylation. *Bioinformatics* *29*, 2645–2646.
- Santos, F., Zakhartchenko, V., Stojkovic, M., Peters, A., Jenuwein, T., Wolf, E., Reik, W., and Dean, W. (2003). Epigenetic marking correlates with developmental potential in cloned bovine preimplantation embryos. *Curr Biol* *13*, 1116–1121.
- Sharif, J., Endo, T.A., Nakayama, M., Karimi, M.M., Shimada, M., Katsuyama, K., Goyal, P., Brind'Amour, J., Sun, M.-A., Sun, Z., et al. (2016). Activation of Endogenous Retroviruses in Dnmt1<sup>-/-</sup> ESCs Involves Disruption of SETDB1-Mediated Repression by NP95 Binding to Hemimethylated DNA. *Cell Stem Cell*.
- Smallwood, S.A., Tomizawa, S.-I., Krueger, F., Ruf, N., Carli, N., Segonds-Pichon, A., Sato, S., Hata, K., Andrews, S.R., and Kelsey, G. (2011). Dynamic CpG island methylation landscape in oocytes and preimplantation embryos. *Nat Genet* *43*, 811–814.
- Song, Q., Decato, B., Hong, E.E., Zhou, M., Fang, F., Qu, J., Garvin, T., Kessler, M., Zhou, J., and Smith, A.D. (2013). A reference methylome database and analysis pipeline to facilitate integrative and comparative epigenomics. *PLoS ONE* *8*, e81148.
- Takashima, Y., Guo, G., Loos, R., Nichols, J., Ficuz, G., Krueger, F., Oxley, D., Santos, F., Clarke, J., Mansfield, W., et al. (2014). Resetting Transcription Factor Control Circuitry toward Ground-State

Pluripotency in Human. *Cell* 158, 1254–1269.

Thomson, J.A., Itskovitz-Eldor, J., Shapiro, S.S., Waknitz, M.A., Swiergiel, J.J., Marshall, V.S., and Jones, J.M. (1998). Embryonic stem cell lines derived from human blastocysts. *Science* 282, 1145–1147.

Vooijs, M., Jonkers, J., and Berns, A. (2001). A highly efficient ligand-regulated Cre recombinase mouse line shows that LoxP recombination is position dependent. *EMBO Rep* 2, 292–297.

Ying, Q.-L., Wray, J., Nichols, J., Battle-Morera, L., Doble, B., Woodgett, J., Cohen, P., and Smith, A. (2008). The ground state of embryonic stem cell self-renewal. *Nature* 453, 519–523.

Yu, M., Hon, G.C., Szulwach, K.E., Song, C.-X., Zhang, L., Kim, A., Li, X., Dai, Q., Shen, Y., Park, B., et al. (2012). Base-resolution analysis of 5-hydroxymethylcytosine in the mammalian genome. *Cell* 149, 1368–1380.

Zhao, L., Sun, M.-A., Li, Z., Bai, X., Yu, M., Wang, M., Liang, L., Shao, X., Arnovitz, S., Wang, Q., et al. (2014). The dynamics of DNA methylation fidelity during mouse embryonic stem cell self-renewal and differentiation. *Genome Research* 24, 1296–1307.
